# Supplementary material for: Nb-doped layered FeNi phosphide nanosheets for highly efficient overall water splitting under high current densities
Source: Royal Society of Chemistry journal article supplement (doi:10.1039/d1ta00372k), 2021-01-01
Supplement: d1ta00372k1.pdf [file d1ta00372k1.pdf]

## Electronic Supplementary Information

### Nb-doped layered FeNi phosphide nanosheets for highly-efficient overall water splitting under high current densities

Shuting Wen,<sup>a</sup> Guangliang Chen,<sup>\*a</sup> Wei Chen,<sup>\*b</sup> Mengchao Li,<sup>b</sup> Bo Ouyang,<sup>\*c</sup> Xingquan Wang,<sup>b</sup>  
Dongliang Chen,<sup>a</sup> Teng Gong,<sup>b</sup> Xianhui Zhang,<sup>d</sup> Jun Huang<sup>\*b,e</sup> and Kostya (Ken) Ostrikov<sup>e,f</sup>

<sup>a</sup>School of Materials Science and Engineering, Zhejiang Sci-Tech University, Hangzhou 310018,  
People's Republic of China

\*E-mail: glchen@zstu.edu.cn

<sup>b</sup>School of Physics and Electronic Information, Gannan Normal University, Ganzhou, Jiangxi 341000,  
People's Republic of China

\*E-mail: chwbetter@163.com; junhuang66@163.com

<sup>c</sup>Department of Applied Physics & Institution of Energy & Microstructure, Nanjing University of  
Science & Technology, Nanjing 210094, People's Republic of China

\*E-mail: ouyangboyi@outlook.com

<sup>d</sup>Institute of Electromagnetics and Acoustics, Fujian Provincial Key Laboratory of Plasma and Magnetic  
Resonance, Department of Electronic Science, Xiamen University, Xiamen 361005, People's Republic  
of China

<sup>e</sup>School of Chemistry and Physics, Queensland University of Technology, Brisbane, QLD 4000,  
Australia

<sup>f</sup>Centre for Materials Science, Queensland University of Technology, Brisbane, QLD 4000, Australia

## 1. Experimental

### 1.1 Fabrication of NiFe LDH-Nb<sub>2</sub>O<sub>5</sub>/PNF

For getting a clear reactive substrate, the NF (1 × 3 cm) was respectively washed with acetone and 10 wt % hydrochloric acid solution for 10 minutes in an ultrasonic device, and the sample was rinsed three times with absolute ethanol and deionized water, respectively. Then, the washed NF was contained in an air-oven at 50 °C for 4 hours and weigh the sample mass. Subsequently, both sides of the NF substrate were treated by the DBD plasma for about 15 min (PNF). The NiFe LDH-Nb<sub>2</sub>O<sub>5</sub>/PNF was successfully fabricated with a facile hydrothermal method. In brief, 1.5 mmol Ni(NO<sub>3</sub>)<sub>2</sub>·6H<sub>2</sub>O, 0.167 mmol Fe(NO<sub>3</sub>)<sub>3</sub>·9H<sub>2</sub>O, 0.333 mmol NbCl<sub>5</sub>, 5 mmol urea and 2.5 mmol NH<sub>4</sub>F were dissolved into 20 ml deionized water and stirred by a magnetic device until a uniform solution was formed. The prepared solution and PNF (1 × 3 cm) were added into a 30 mL reactive autoclave and kept at 150 °C for 10 hours. After the reaction, the autoclave was cooled down to 20 °C and the fabricated samples were repeatedly cleared with 99.9 % ethanol and deionized water for 3 times. Finally, the samples were dried for 6 hours at 50 °C for subsequent reactions. In addition, the catalysts fabricated with different reaction parameters were also explored for the comparison purposes.

### 1.2 Fabrication of Ni<sub>12</sub>P<sub>5</sub>-Fe<sub>2</sub>P-NbP/PNF structures

The prepared NiFe LDH-Nb<sub>2</sub>O<sub>5</sub>/PNF (1 × 1 cm) and 0.2 g red phosphorus powder were put into the corundum boats. The red phosphorus powder was placed in the upstream position, and the NiFe LDH-Nb<sub>2</sub>O<sub>5</sub>/PNF was placed in the downstream location of the tube reactor. Then, the tubular furnace was heated to 500 °C at a heating rate of 5 °C min<sup>-1</sup> and maintained for 2 h under a nitrogen ambient condition. As a result, the NiFeNb phosphide was obtained after it was cooled to room temperature, and the catalyst mass formed on the PNF surface was also detected (2.5 mg cm<sup>-2</sup>).

### 1.3 Structure characterization

The surface structure of Ni<sub>12</sub>P<sub>5</sub>-Fe<sub>2</sub>P-NbP nano-flakes on PNF was detected by using the field-emission scanning electron microscope or transmission electron microscope, as well as their EDS mapping images. The evolution of the crystal phases and the elemental states of Ni<sub>12</sub>P<sub>5</sub>-Fe<sub>2</sub>P-NbP before and after HER and OER processes were analyzed by using X-ray diffractometer (XRD) and X-ray photoelectron spectroscopy (XPS), respectively. The frame structure of Ni<sub>12</sub>P<sub>5</sub>-Fe<sub>2</sub>P-NbP/PNF after a prolonged electrolysis was detected by a Raman spectrometer. Noted that all the measuring systems and testing conditions are similar with those used in our previous work.<sup>S1</sup>

### 1.4 Electrochemical evaluation

The electrochemical properties of the resulting catalysts were tested in a standard three-electrode cell in 1 M KOH solution (pH 14) by using an electrochemical workstation (Model: CHI 660E, Shanghai Chenhua Instrument Co, Ltd) at 25 °C. The testing cell contained a working electrode of electrocatalyst, a reference electrode of Hg/Hg<sub>2</sub>Cl<sub>2</sub> (saturated KCl solution) and a counter electrode of carbon rod. All obtained potentials were calibrated to a reversible hydrogen electrode (RHE) using the calculation method given in reference.<sup>S2</sup> In brief, the catalyst was cut into 0.5 × 0.5 cm (0.25 cm<sup>2</sup>), and activated by a cyclic voltammetry (CV) scanning for 800 cycles to ensure the stability and accuracy of detected results. Then, the measurements of linear sweep voltammetry (LSV), *iR*-compensating LSV, electrochemical impedance spectroscopy (EIS), the electrochemical active surface area (ECSA), and turnover frequency (TOF) values were performed with similar methods reported in the previous works.<sup>S3-S5</sup> For comparison, the electrocatalytic performances of PNF coated with 20 wt % Pt/C for HER electrode and RuO<sub>2</sub> for OER electrode, which has the same loading rate as Ni<sub>12</sub>P<sub>5</sub>-Fe<sub>2</sub>P-NbP (2.5

mg cm<sup>-2</sup>), were also studied. In addition, the electrocatalytic durability and stability of the as-prepared catalysts were indicated by the measured chronoamperometric curves (*I-t*) at  $j_{100}$  and  $j_{300}$  for 100 h. Furthermore, a simple drainage method was used to detect the generation efficiency of hydrogen and oxygen, and the volume of exhaust gas was recorded each 10 minutes. Finally, a two-electrode cell equipped with Ni<sub>12</sub>P<sub>5</sub>-Fe<sub>2</sub>P-NbP/PNF electrodes was assembled to explore the bifunctional performance of the catalyst for overall water splitting, as well as to measure the long-term *I-t* curve under the constant current density of  $j_{10}$ .

### 1.5 Theory simulations

Herein, the density functional theory (DFT) calculations are performed following the similar methods explained previously.<sup>S4</sup> Briefly, the interaction between the ions and electrons is described according to the projector augmented wave (PAW) method. The vacuum layer is set to 20 Å along the perpendicular direction of the atomistic models to inhibit the interaction between periodical cells. The kinetic cutoff energy was set to 500 eV along with the *k*-point mesh of 2×2×1 for all the cells. In terms of the structural optimization, atomic positions, shape and volume of all the cells can relax in all directions until the total energy and forces are converged within less than 10<sup>-5</sup> eV per atom and 0.01 eV Å<sup>-1</sup>, respectively.

According to HER dynamics, the hydrogen intermediate was adsorbed onto surfaces of Ni<sub>12</sub>P<sub>5</sub>, Fe<sub>2</sub>P and NbP, denoted as H\*. The reaction could be expressed as:

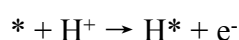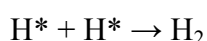

In terms of OER dynamics, the intermediates of O, OH and OOH ions were adsorbed on to substrate surfaces, termed as O\*, OH\* and OOH\*. The reaction could be expressed as:

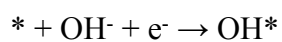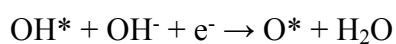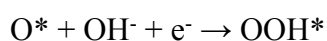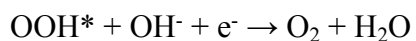

where \* stands for an active site on the catalyst surface. OH\*, O\*, OOH\* and H\* represent different adsorbed intermediates. Since the Gibbs free energy ( $\Delta G$ ) can be obtained under the set of standard conditions ( $T = 298.15$  K,  $\text{pH} = 14$ , external potential = 0), and it can be calculated as follows:

$$\Delta G = \Delta E + \Delta \text{ZPE} - \Delta \text{TS} ,$$

where  $\Delta E$  serves as the absorbed energy between the reactant and product in the reaction. Furthermore,  $\Delta \text{ZPE}$  and  $\Delta \text{TS}$  denote the difference of zero-point energy and entropic contribution, respectively.

## 2. Supplementary Figures

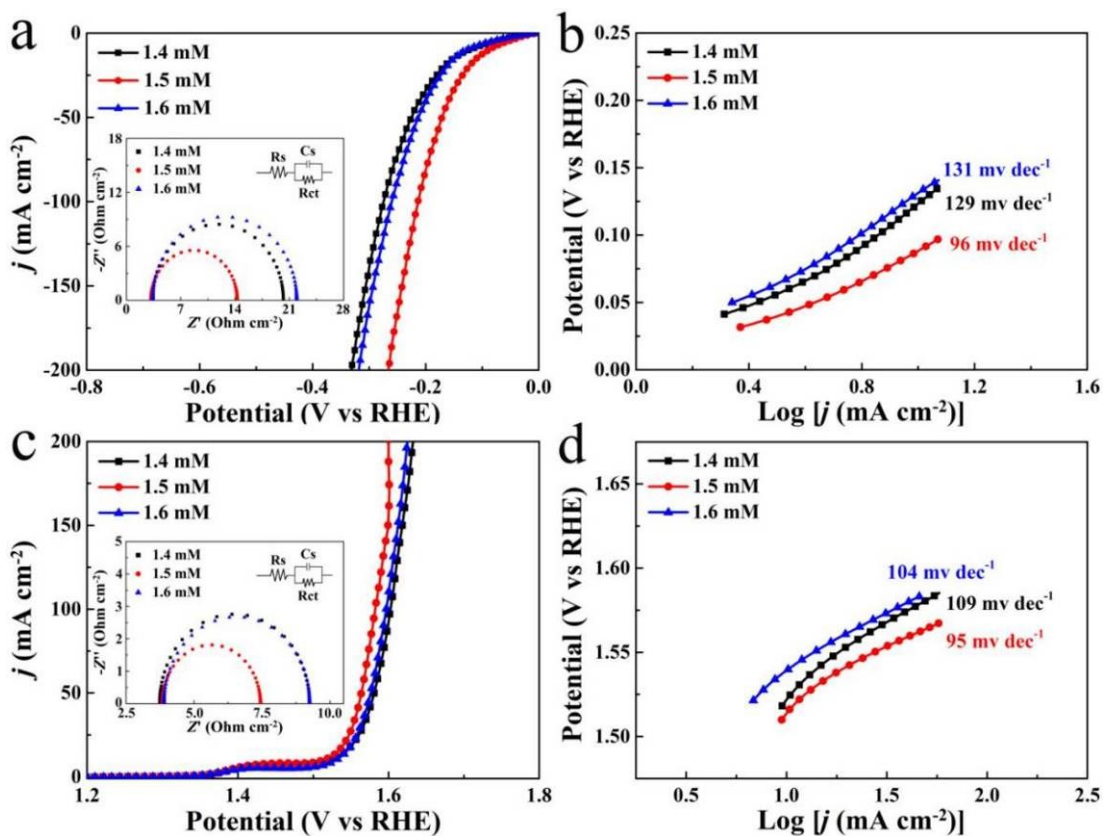

**Figure S1.** The effects of  $\text{Ni}(\text{NO}_3)_2$  concentration on the HER and OER performances of NiFe LDH- $\text{Nb}_2\text{O}_5$ /PNF. (a) Polarization curves in 1 M KOH for HER and the insert is the corresponding Nyquist plots, (b) The Tafel plots derived from the data in (a), (c) Polarization curves in 1 M KOH for OER and the insert is the corresponding Nyquist plots, and (d) The Tafel plots derived from the data in (c).

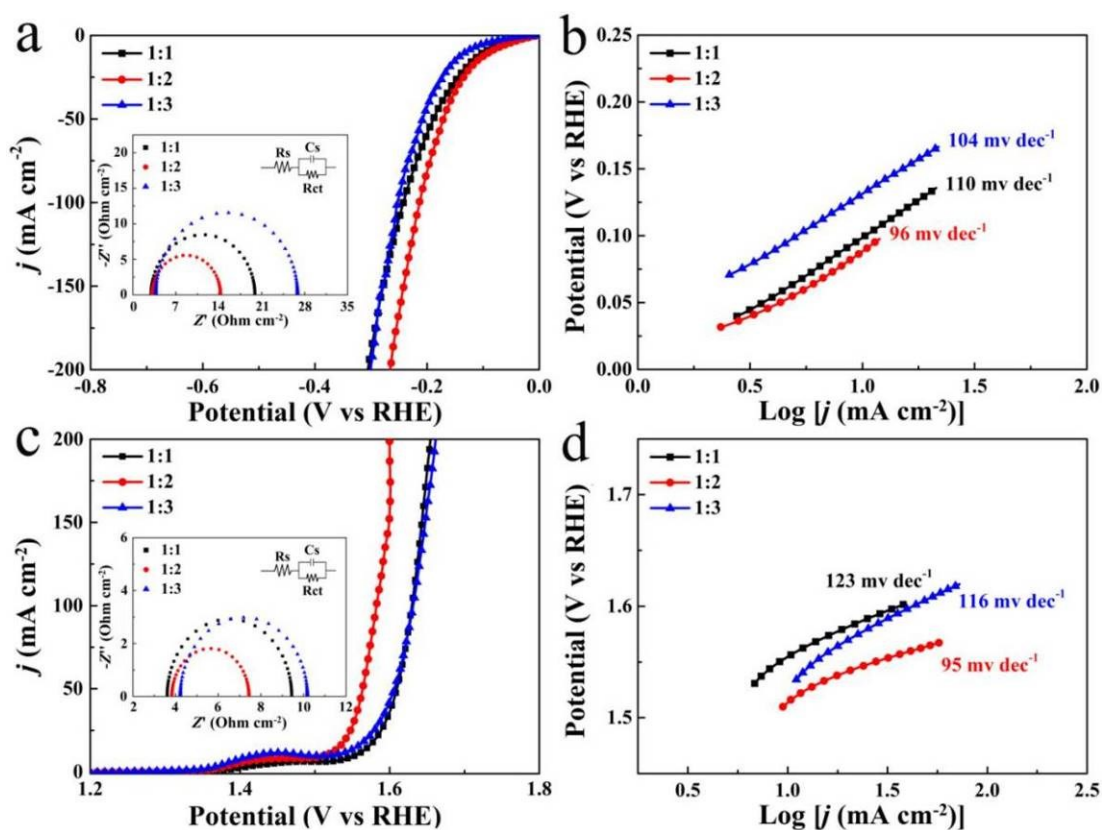

**Figure S2.** The effects of Fe/Nb ratios on the HER and OER performances of NiFe LDH-Nb<sub>2</sub>O<sub>5</sub>/PNF.

(a) Polarization curves in 1 M KOH for HER and the insert is the corresponding Nyquist plots, (b) The Tafel plots derived from the data in (a), (c) Polarization curves in 1 M KOH for OER and the insert is the corresponding Nyquist plots, and (d) The Tafel plots derived from the data in (c).

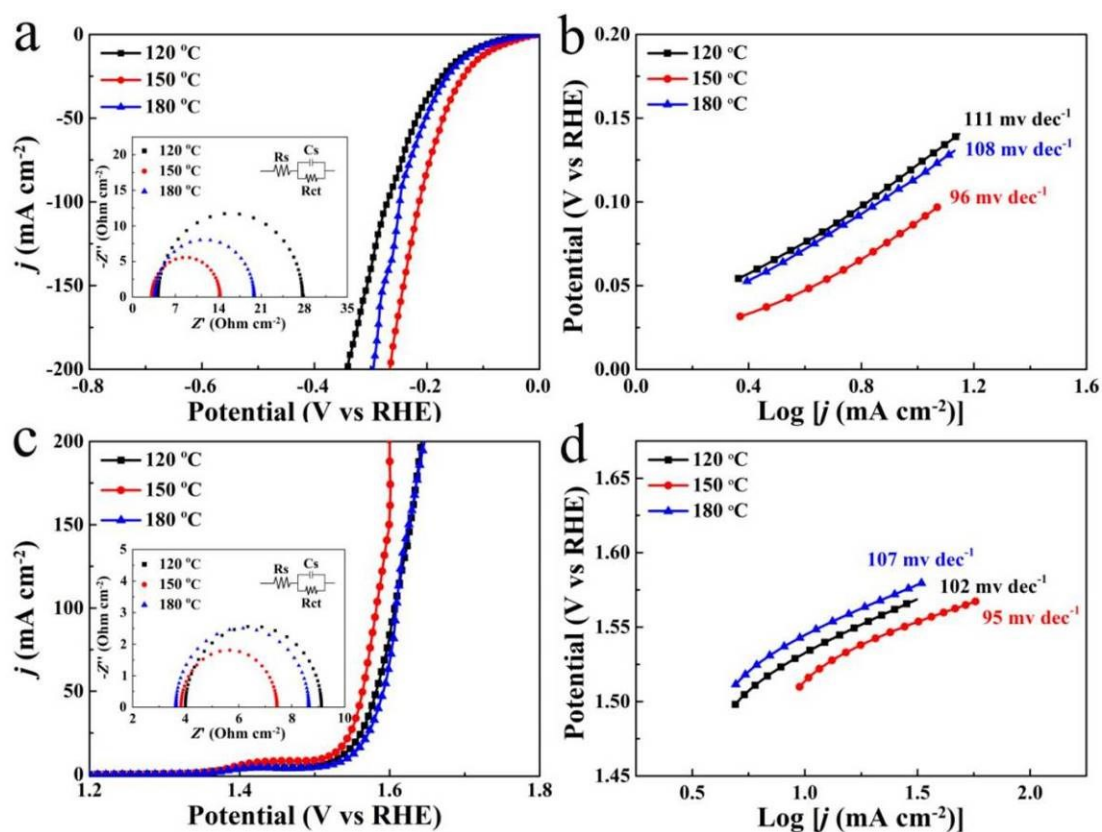

**Figure S3.** The effects of hydrothermal temperature on the HER and OER performances of NiFe LDH-Nb<sub>2</sub>O<sub>5</sub>/PNF. (a) Polarization curves in 1 M KOH for HER and the insert is the corresponding Nyquist plots, (b) The Tafel plots derived from the data in (a), (c) Polarization curves in 1 M KOH for OER and the insert is the corresponding Nyquist plots, and (d) The Tafel plots derived from the data in (c).



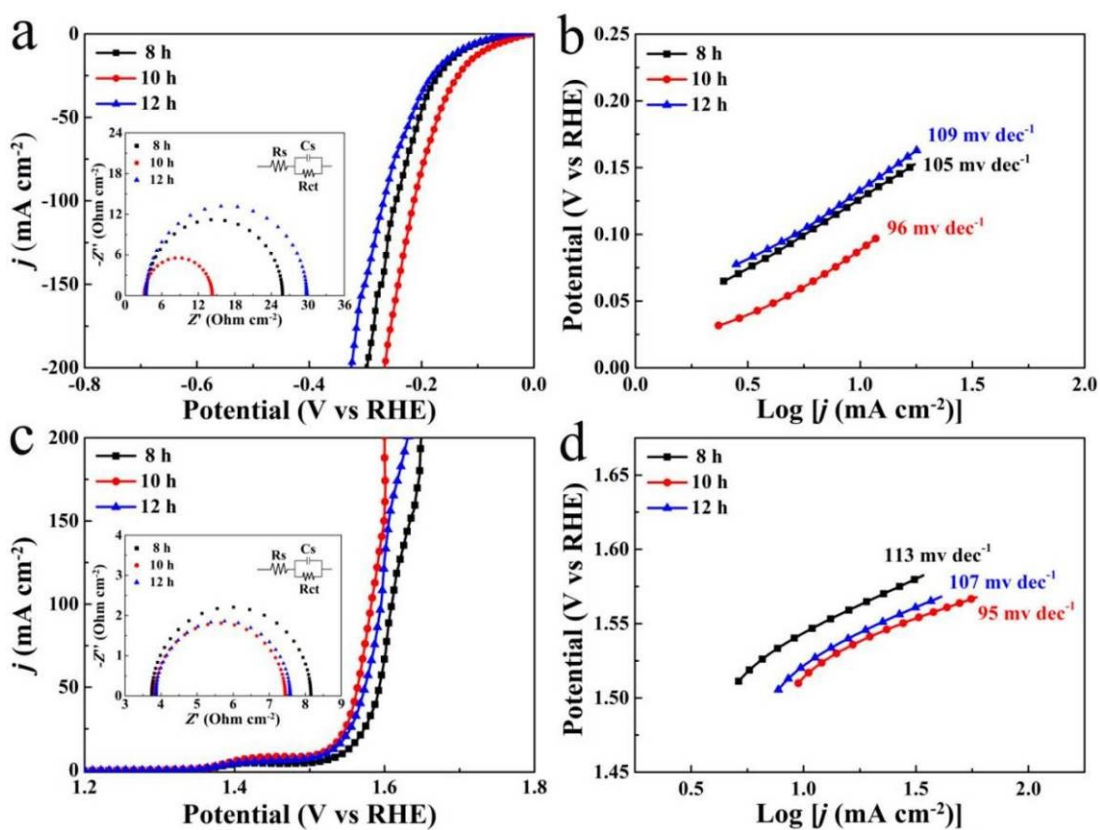

**Figure S4.** The effects of hydrothermal reaction time on the HER and OER performances of NiFe LDH-Nb<sub>2</sub>O<sub>5</sub>/PNF. (a) Polarization curves in 1 M KOH for HER and the insert is the corresponding Nyquist plots, (b) The Tafel plots derived from the data in (a), (c) Polarization curves in 1 M KOH for OER and the insert is the corresponding Nyquist plots, and (d) The Tafel plots derived from the data in (c).

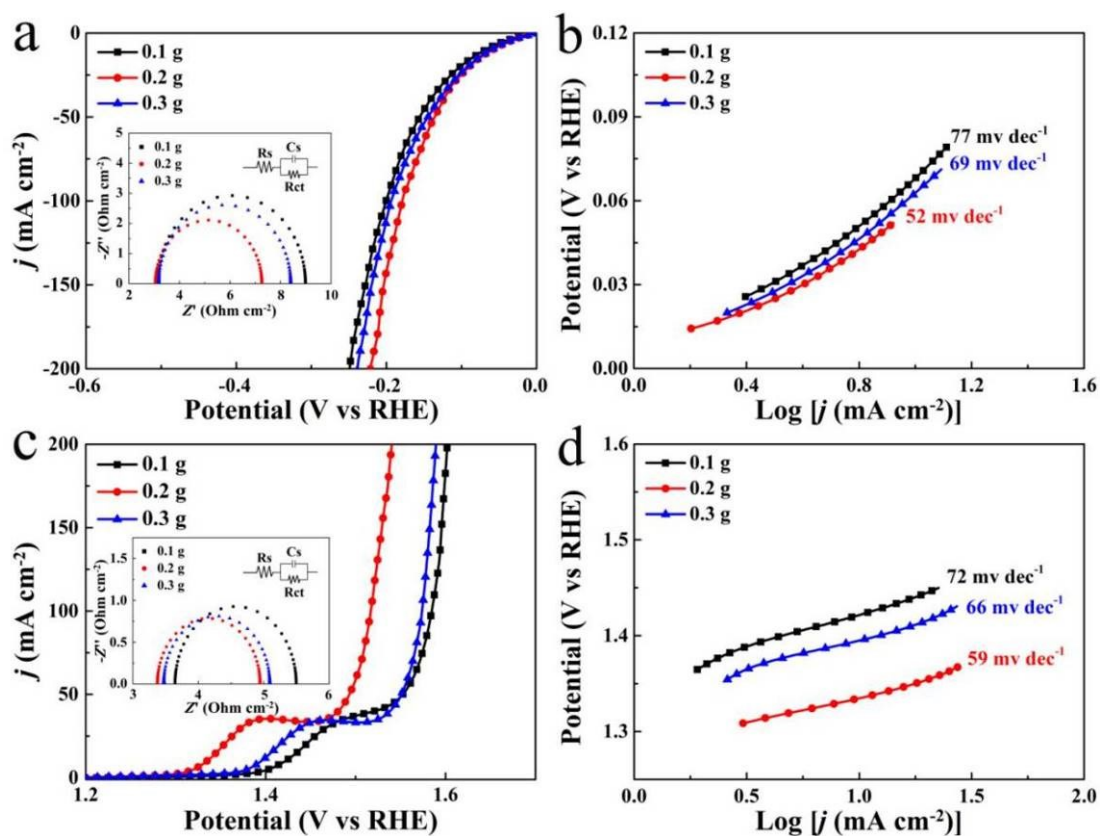

**Figure S5.** The effects of red phosphorus amounts on the HER and OER performances of Ni<sub>12</sub>P<sub>5</sub>-Fe<sub>2</sub>P-NbP/PNF. (a) Polarization curves in 1 M KOH for HER and the insert is the corresponding Nyquist plots, (b) The Tafel plots derived from the data in (a), and (c) Polarization curves in 1 M KOH for OER and the insert is the corresponding Nyquist plots, and (d) The Tafel plots derived from the data in (c).

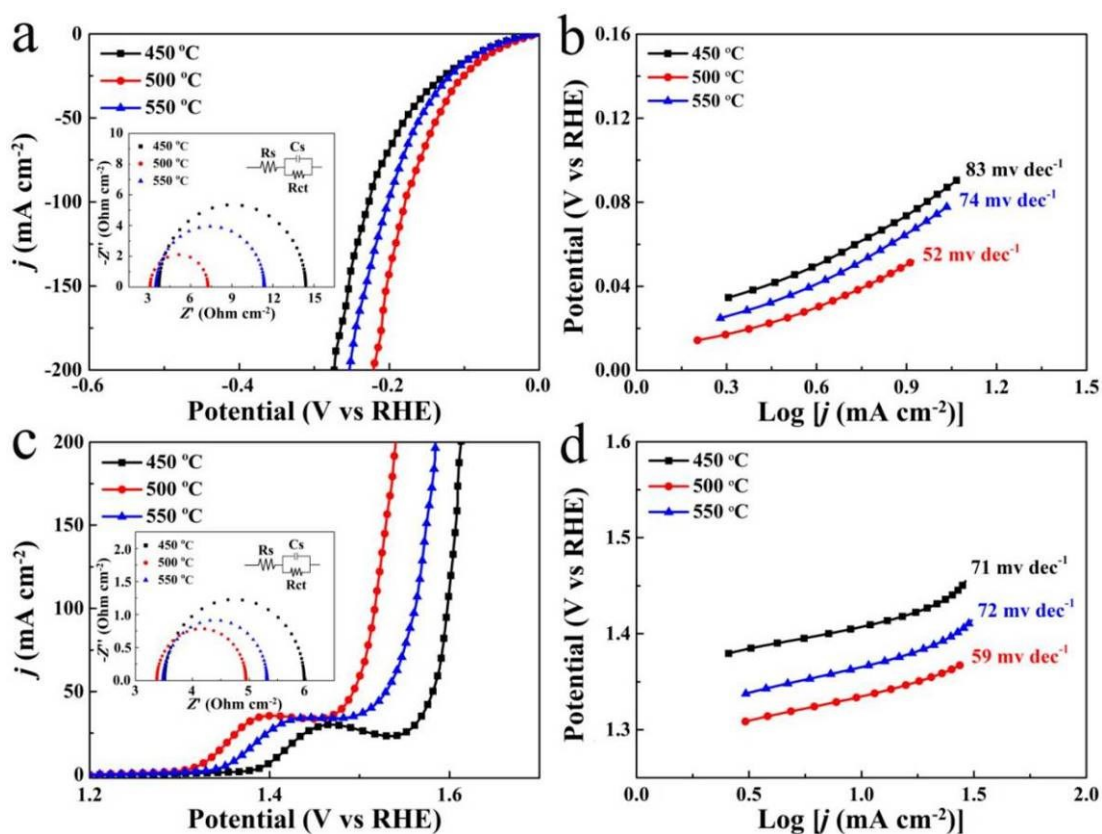

**Figure S6.** The effects of phosphating reaction temperature on the HER and OER performances of Ni<sub>12</sub>P<sub>5</sub>-Fe<sub>2</sub>P-NbP/PNF. (a) Polarization curves in 1 M KOH for HER and the insert is the corresponding Nyquist plots, (b) The Tafel plots derived from the data in (a), (c) Polarization curves in 1 M KOH for OER and the insert is the corresponding Nyquist plots, and (d) The Tafel plots derived from the data in (c).

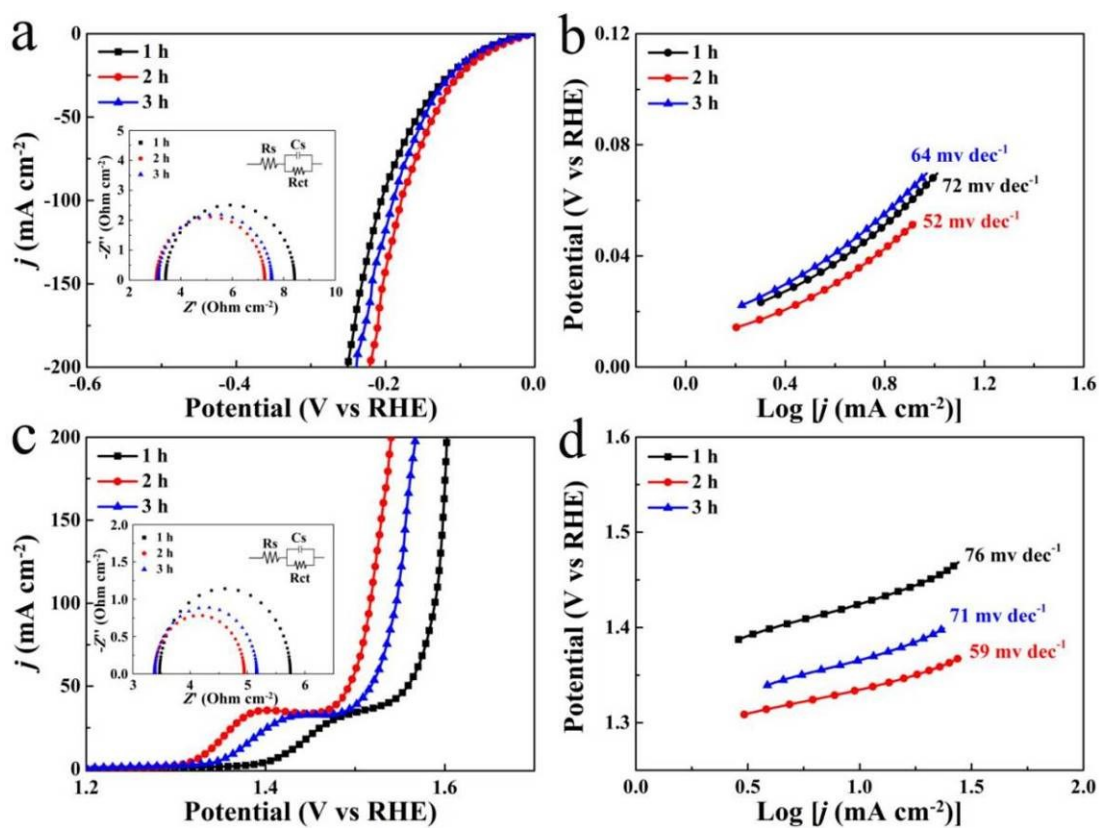

**Figure S7.** The effects of phosphating reaction time on the HER and OER performances of  $\text{Ni}_{12}\text{P}_5\text{-Fe}_2\text{P-NbP/PNF}$ . (a) Polarization curves in 1 M KOH for HER and the insert is the corresponding Nyquist plots, (b) The Tafel plots derived from the data in (a), (c) Polarization curves in 1 M KOH for OER and the insert is the corresponding Nyquist plots, and (d) The Tafel plots derived from the data in (c).

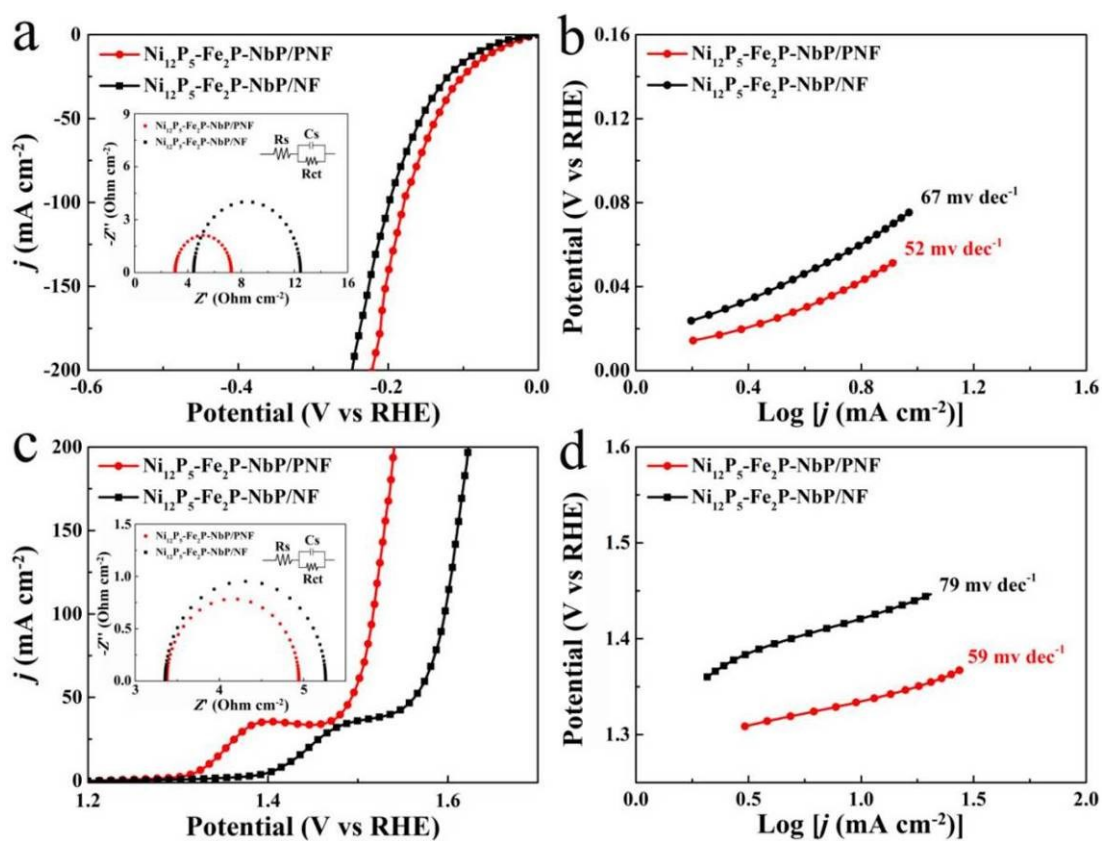

**Figure S8.** The effects of DBD treatment on the HER and OER of  $\text{Ni}_{12}\text{P}_5\text{-Fe}_2\text{P-NbP}$  electrocatalysts. (a) Polarization curves in 1 M KOH for HER and the insert is the corresponding Nyquist plots, (b) The Tafel plots derived from the data in (a), (c) Polarization curves in 1 M KOH for OER and the insert is the corresponding Nyquist plots, and (d) The Tafel plots derived from the data in (c).

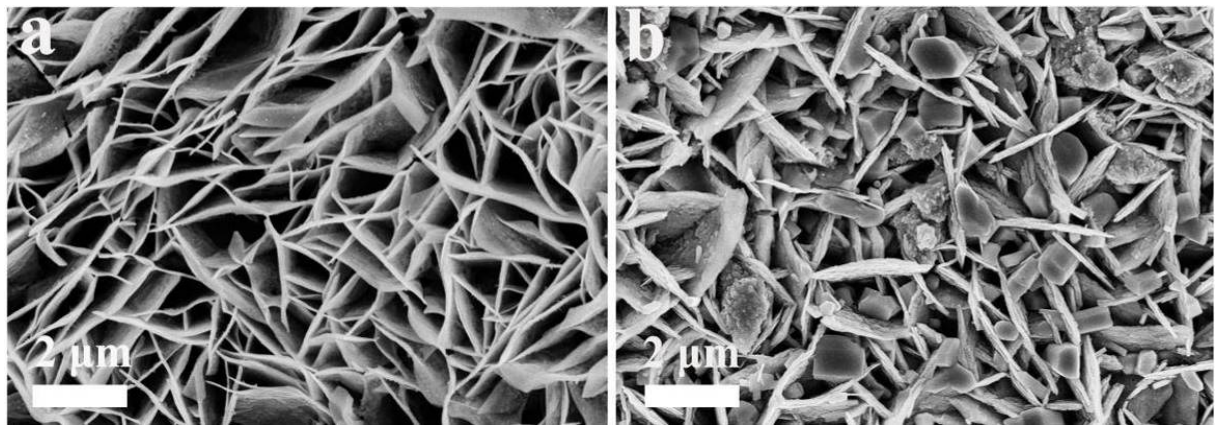

**Figure S9.** SEM images of NiFeP<sub>x</sub>/PNF (a) and NiNbP<sub>x</sub>/PNF (b).

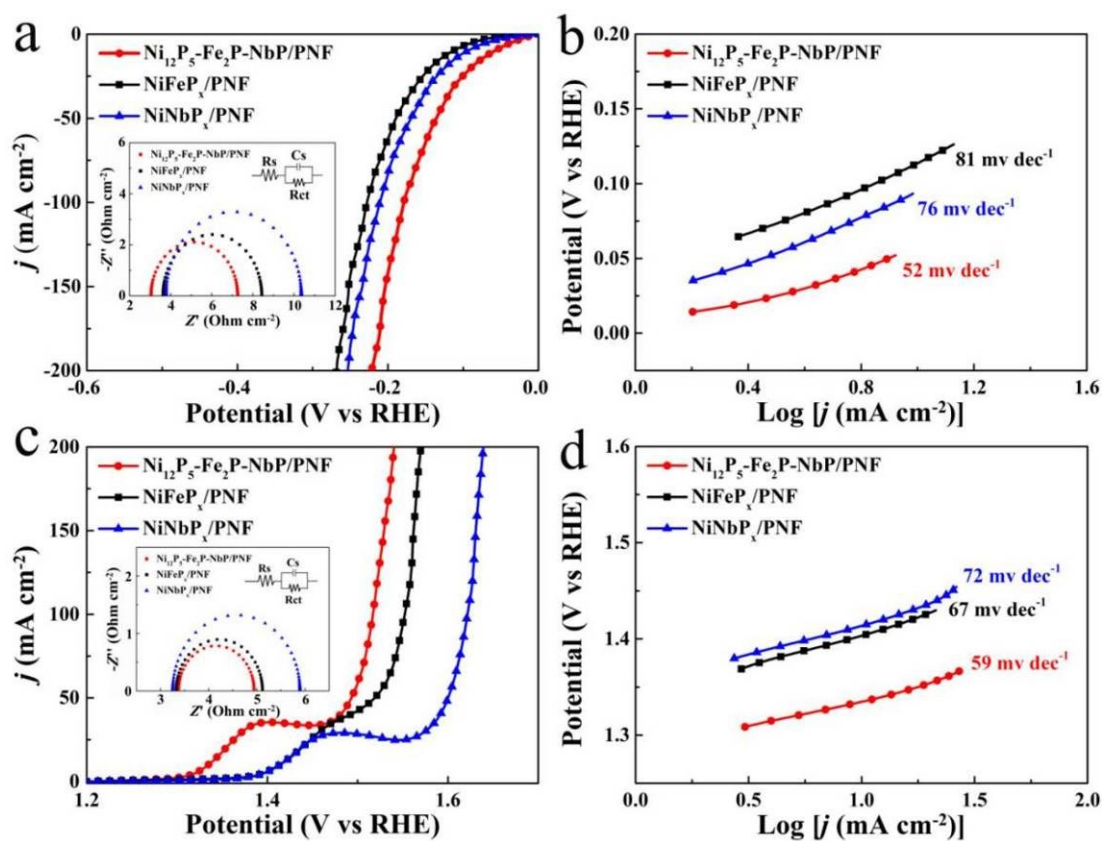

**Figure S10.** The HER and OER performances for  $\text{Ni}_{12}\text{P}_5\text{-Fe}_2\text{P-NbP/PNF}$ ,  $\text{NiFeP}_x/\text{PNF}$ , and  $\text{NiNbP}_x/\text{PNF}$ . (a) Polarization curves in 1 M KOH for HER and the insert is the corresponding Nyquist plots, (b) The Tafel plots derived from the data in (a), (c) Polarization curves in 1 M KOH for OER and the insert is the corresponding Nyquist plots, and (d) The Tafel plots derived from the data in (c).

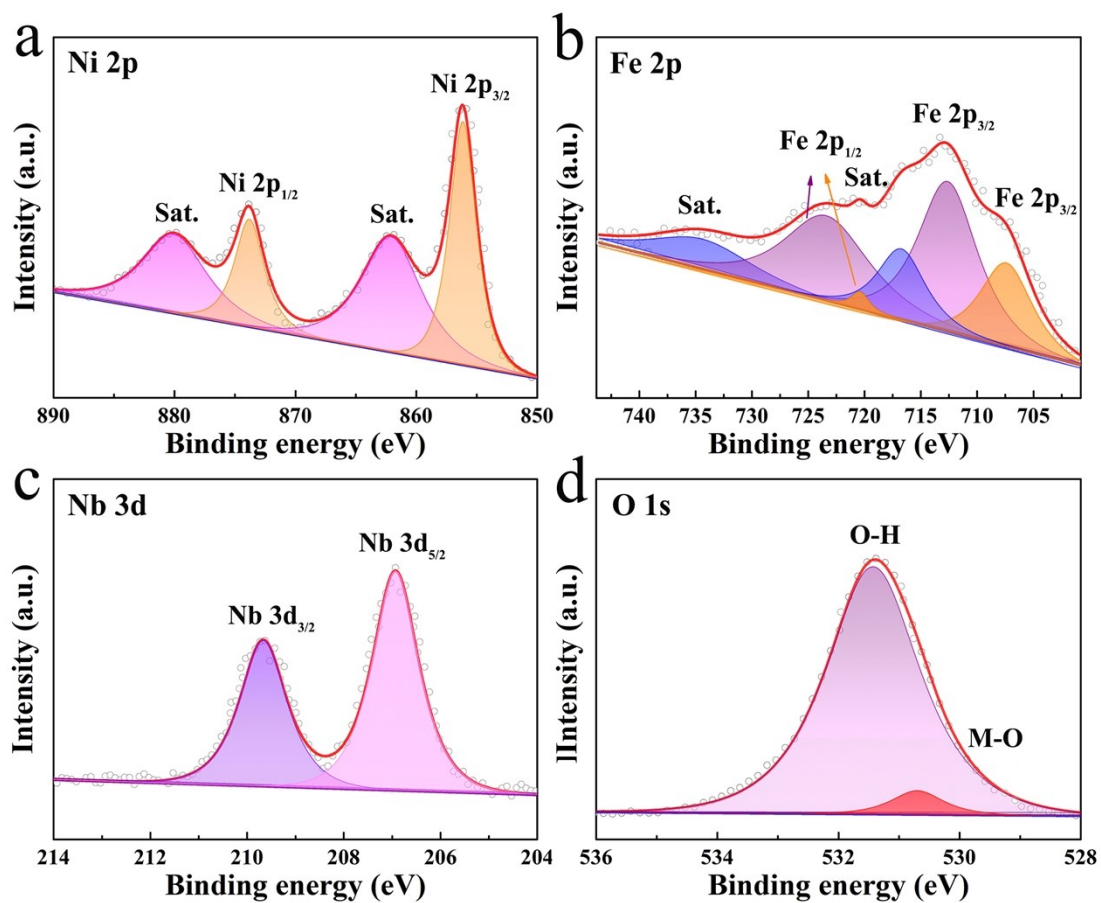

**Figure S11.** The high resolution XPS spectra of NiFe LDH-Nb<sub>2</sub>O<sub>5</sub>/PNF. (a) Ni 2p, (b) Fe 2p, (c) Nb 3d, and (d) O 1s.



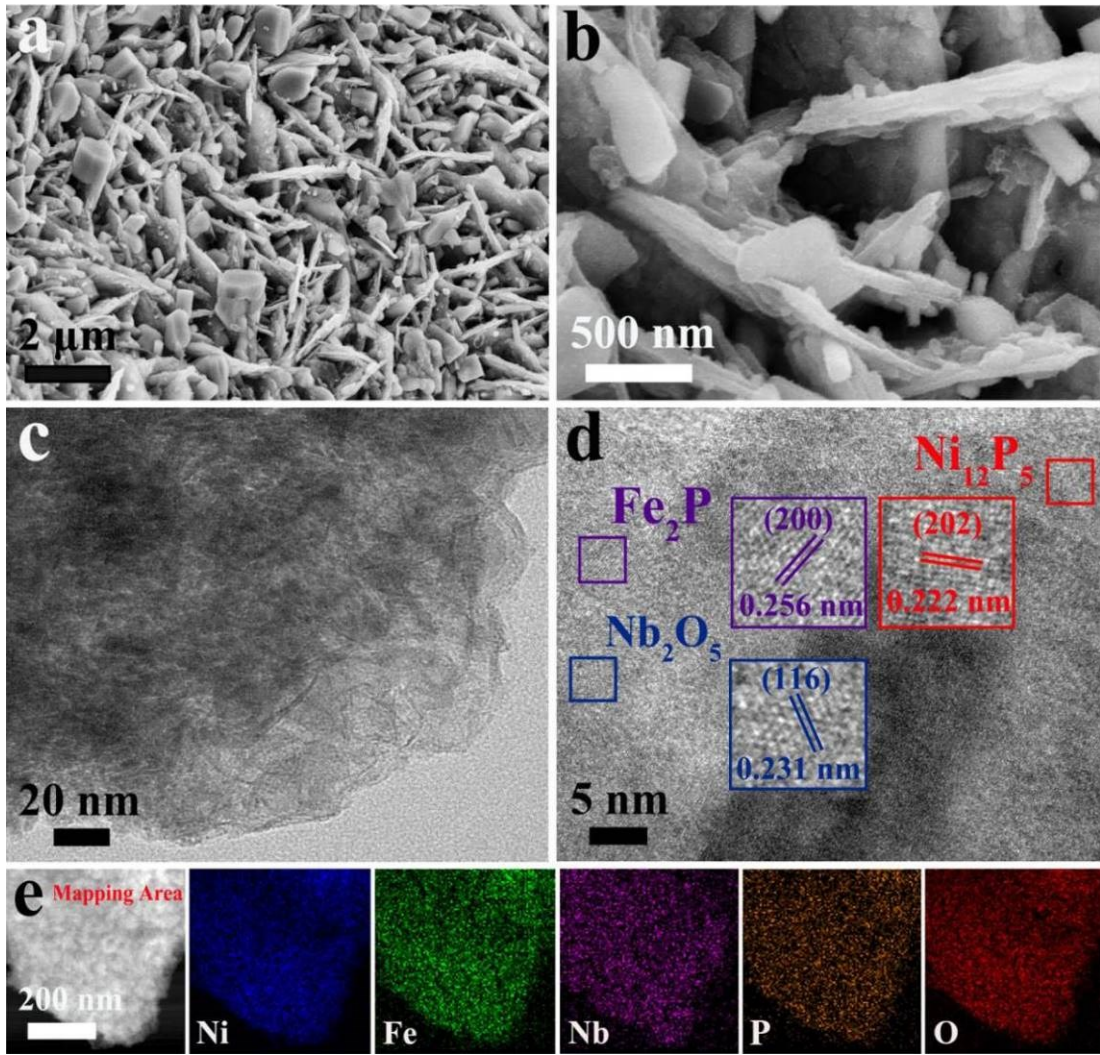

**Figure S12.** The morphology and crystal structures of  $\text{Ni}_{12}\text{P}_5\text{-Fe}_2\text{P-NbP/PNF}$  after 100 h HER processes at a current density of  $j_{300}$  in 1 M KOH solution. (a) Low and (b) High resolution SEM images, (c) Low and (d) High magnification TEM images, and (e) The elements mapping of Ni, Fe, Nb, P and O distributed on the nanosheet.

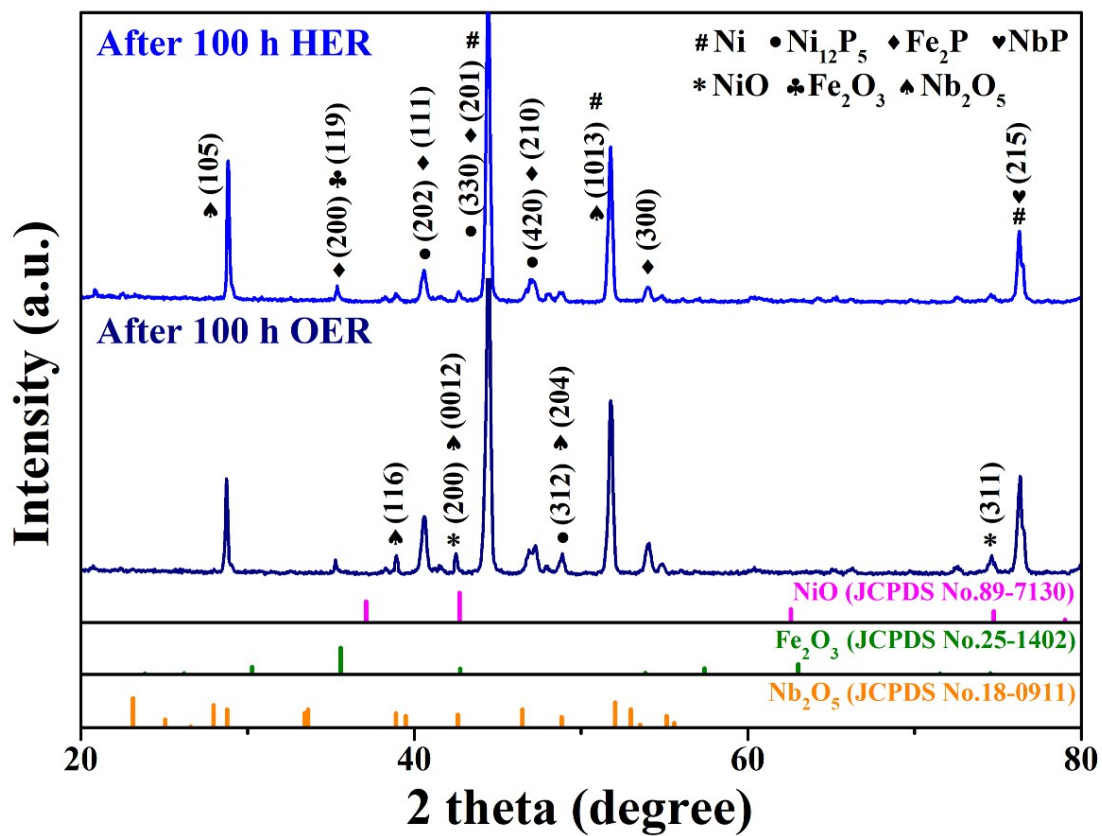

**Figure S13.** The XRD patterns of the Ni<sub>12</sub>P<sub>5</sub>-Fe<sub>2</sub>P-NbP/PNF after 100 h HER and OER processes at a current density of  $j_{300}$  in 1 M KOH.

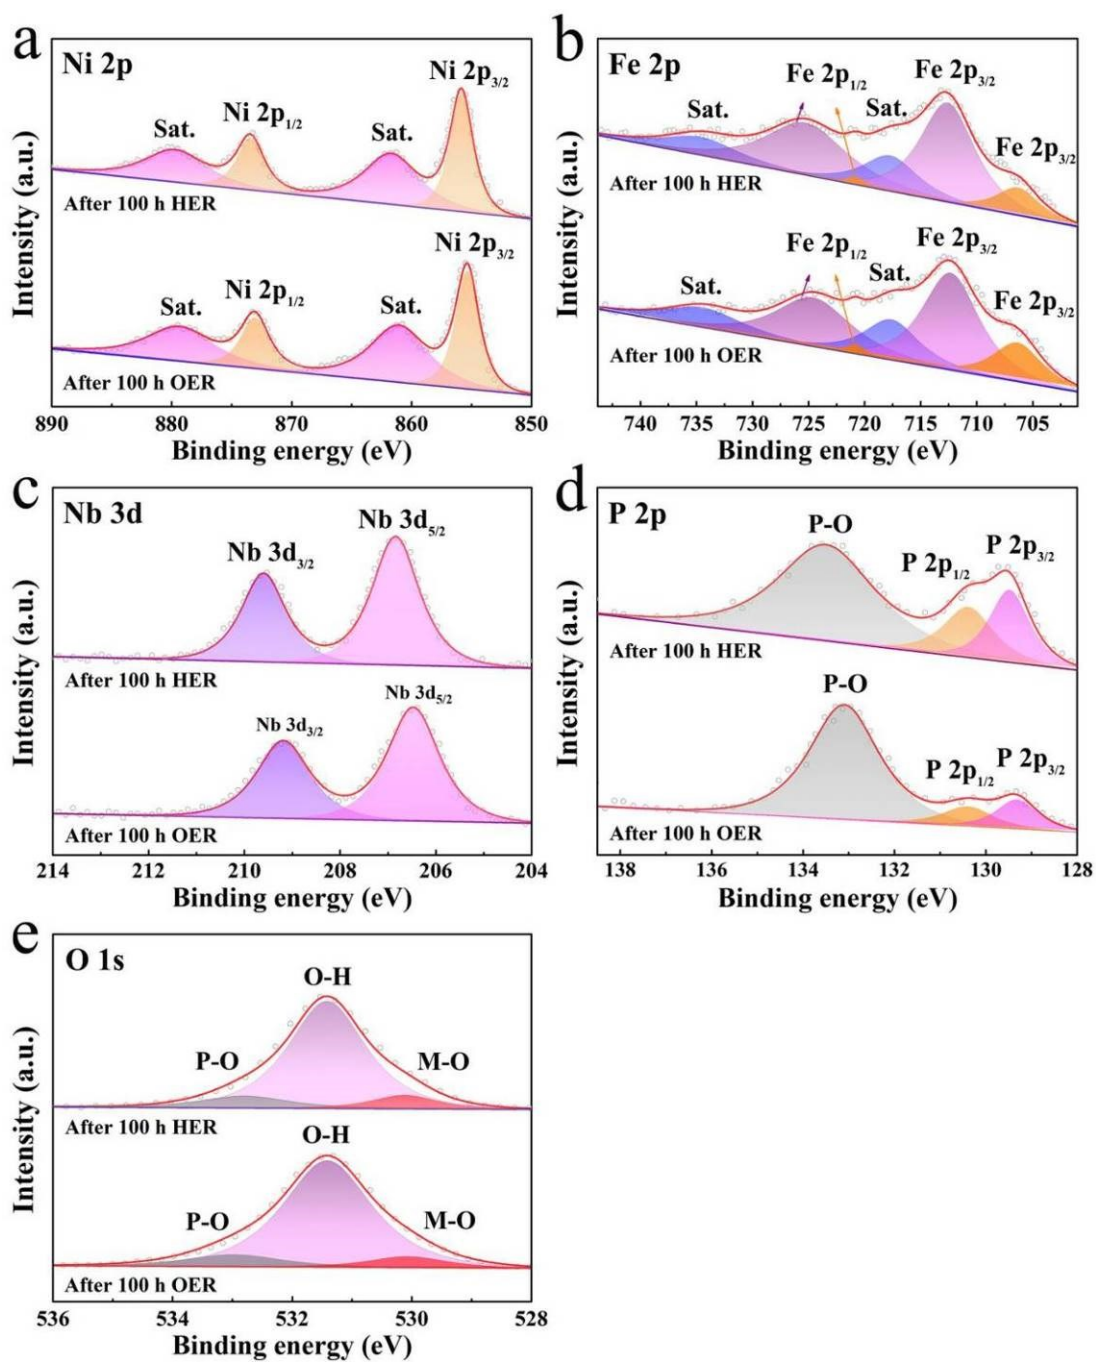

**Figure S14.** High resolution XPS spectra of  $\text{Ni}_{12}\text{P}_5\text{-Fe}_2\text{P-NbP/PNF}$  after 100 h HER and OER tests at a current density of  $j_{300}$  in 1 M KOH. (a) Ni 2p, (b) Fe 2p, (c) Nb 3d, (d) P 2p, and (e) O 1s.

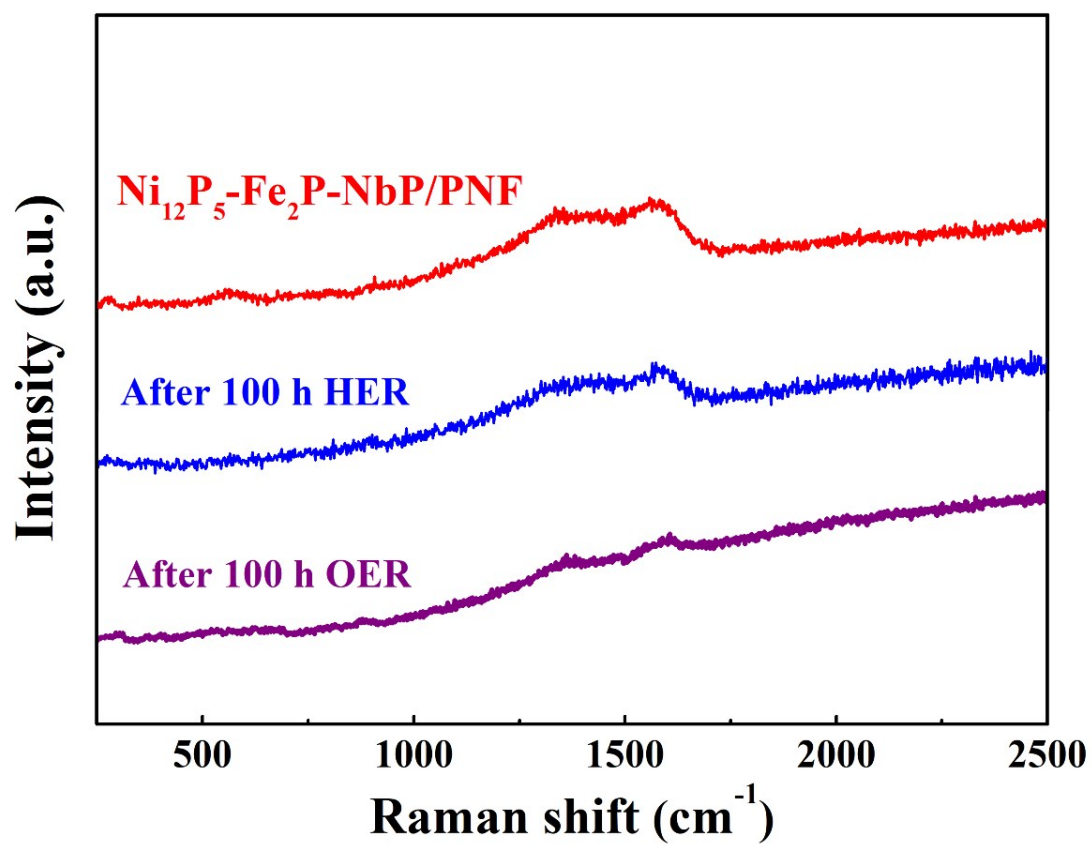

**Figure S15.** Raman spectra of  $\text{Ni}_{12}\text{P}_5\text{-Fe}_2\text{P-NbP/PNF}$  undergoing long-term HER and OER processes.

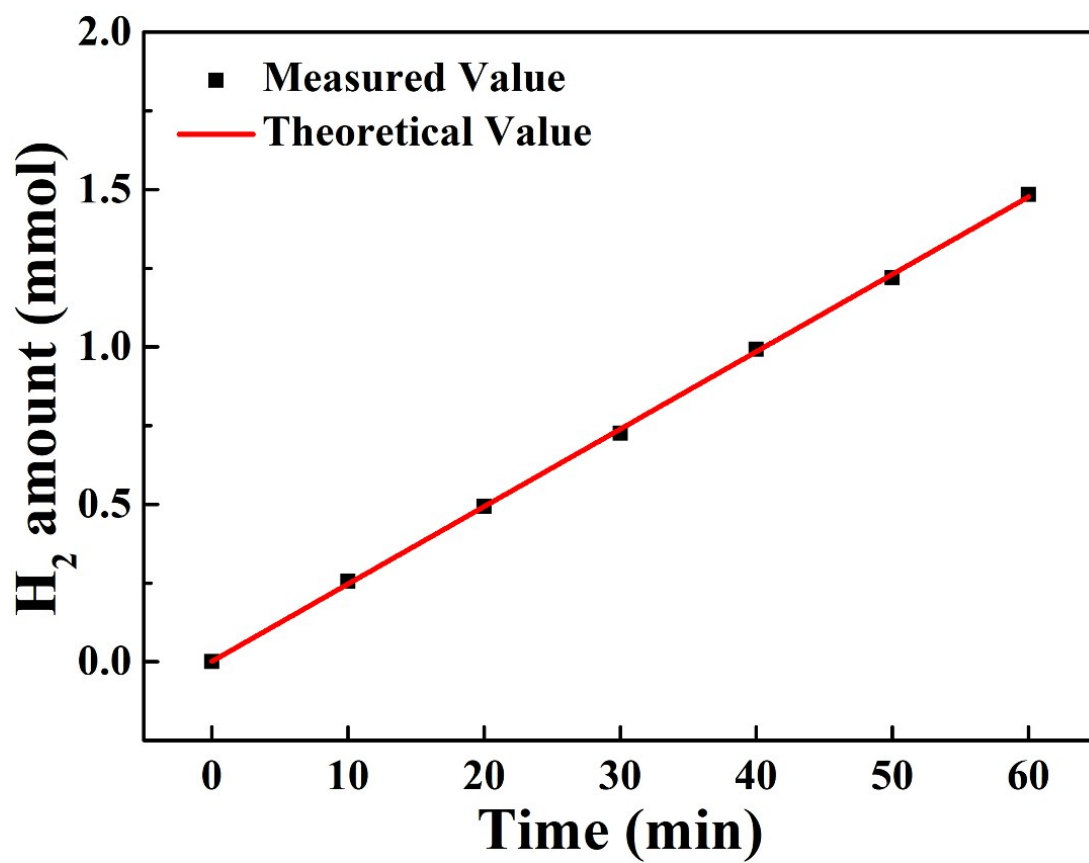

**Figure S16.** The H<sub>2</sub> amount of Ni<sub>12</sub>P<sub>5</sub>-Fe<sub>2</sub>P-NbP/PNF generated at a current density of 10 mA cm<sup>-2</sup>.

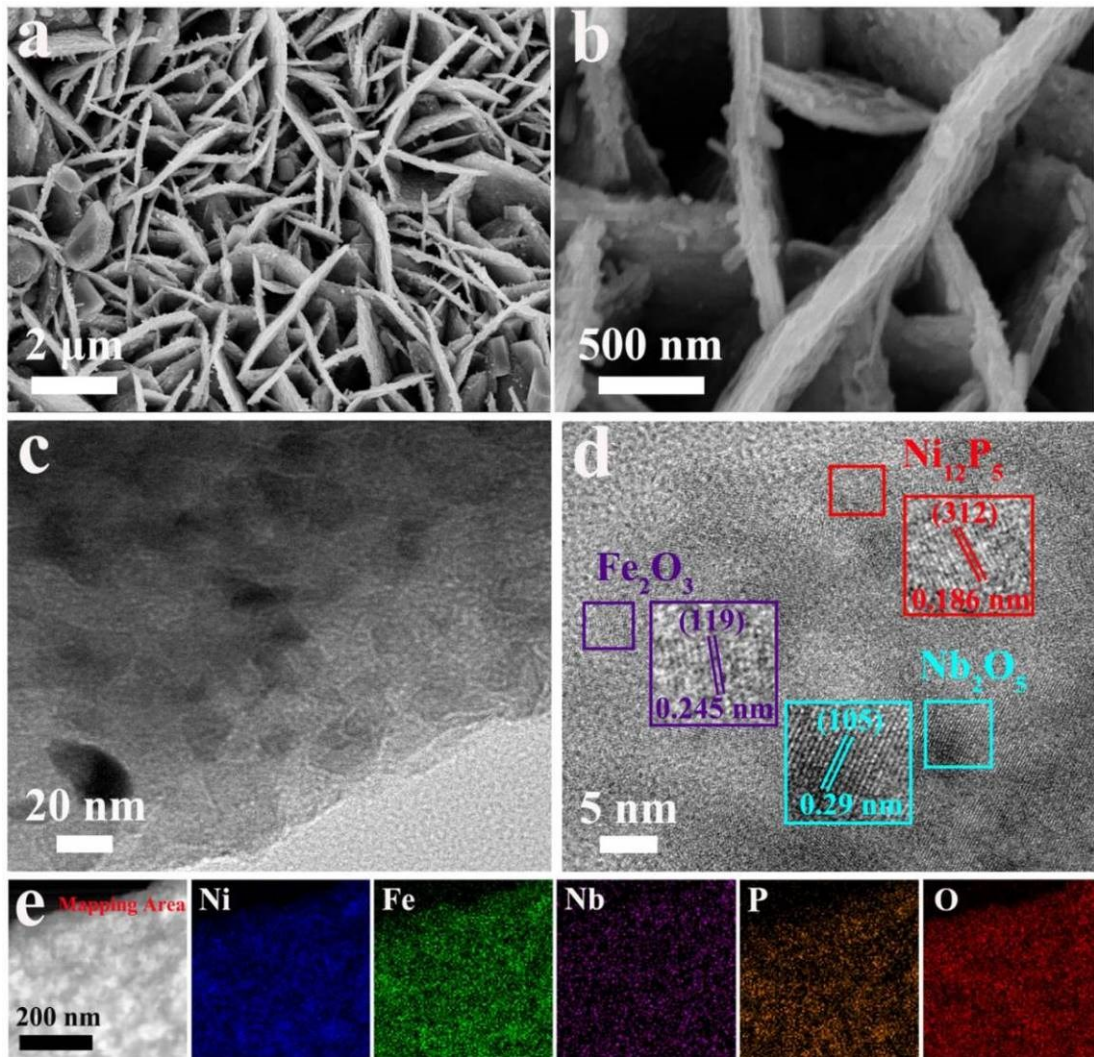

**Figure S17.** The morphology and crystal structures of  $\text{Ni}_{12}\text{P}_5\text{-Fe}_2\text{P-NbP/PNF}$  after 100 h OER processes at a current density of  $j_{300}$  in 1 M KOH. (a) Low and (b) high resolution SEM images, (c) Low and (d) high magnification TEM images, and (e) The elements mapping of Ni, Fe, Nb, P and O distributed on the nanosheet.

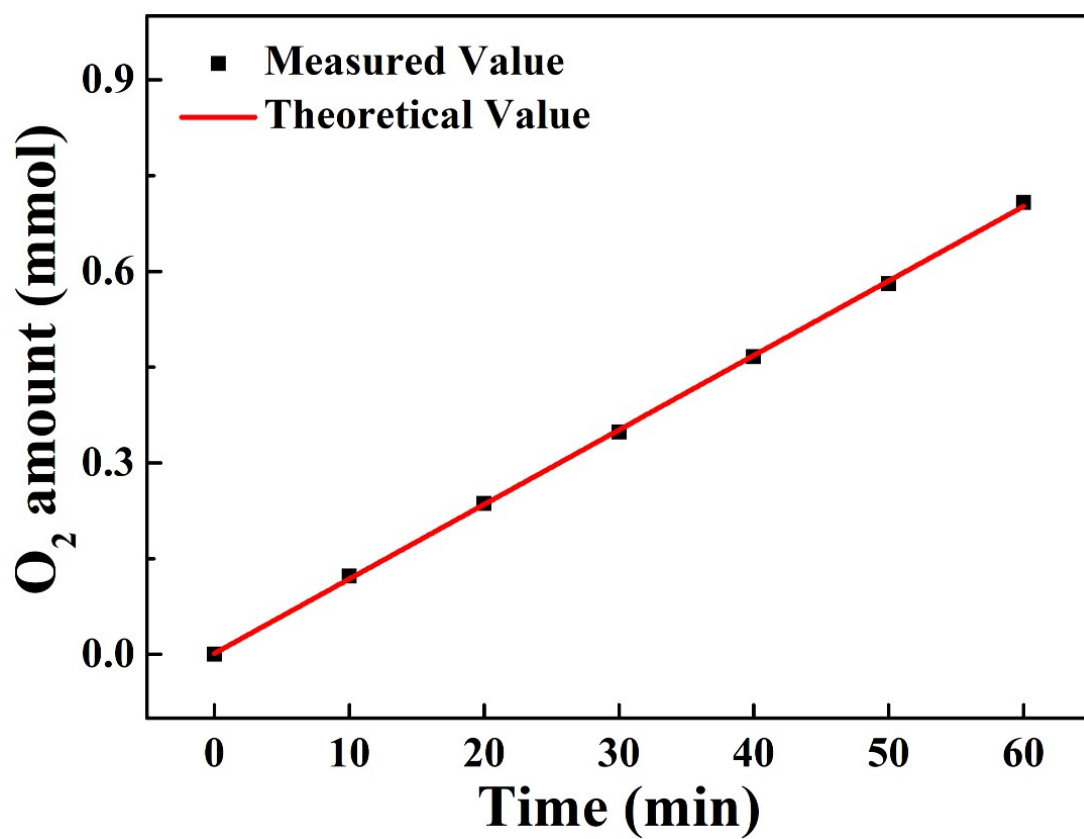

**Figure S18.** The O<sub>2</sub> amount of Ni<sub>12</sub>P<sub>5</sub>-Fe<sub>2</sub>P-NbP/PNF generated at a current density of 10 mA cm<sup>-2</sup>.

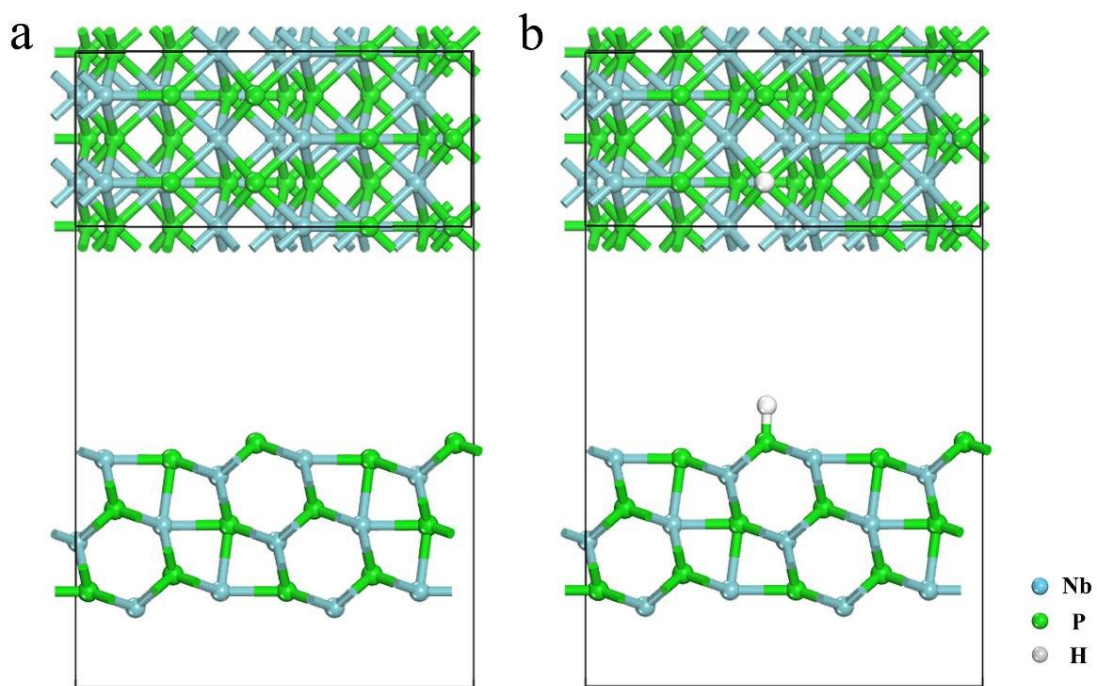

**Figure S19.** Adsorption of H on the (103) surface of NbP, involved in the HER process.



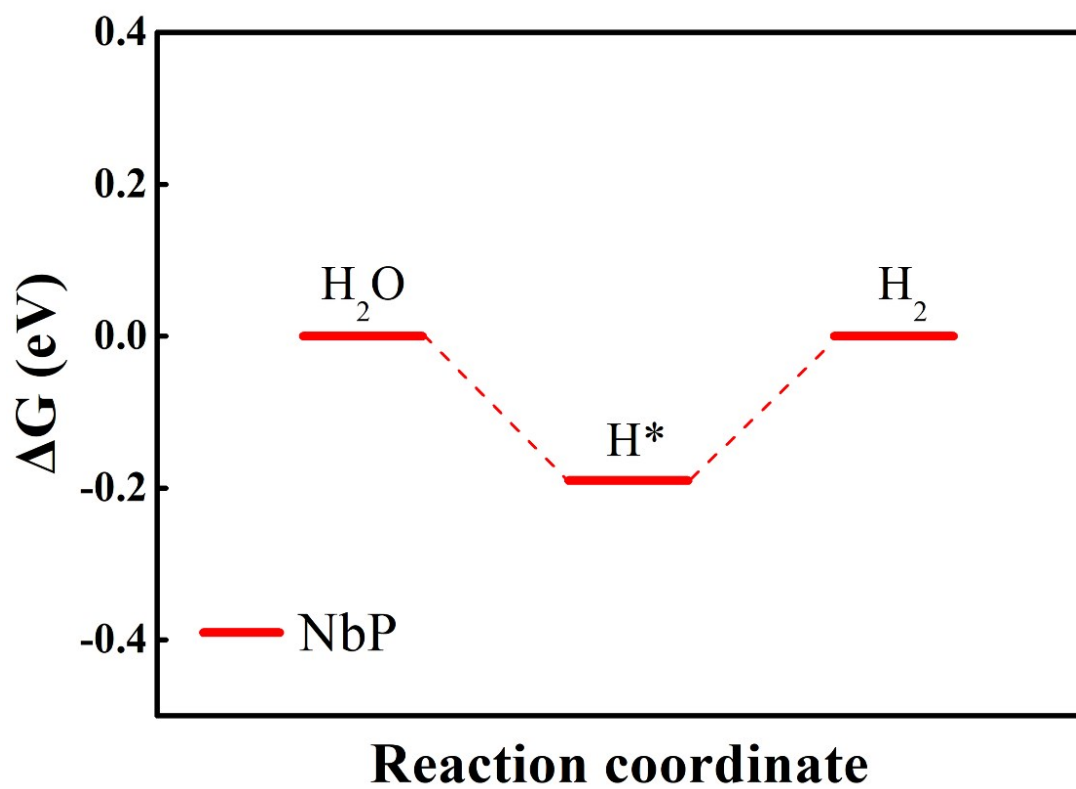

**Figure S20.** Gibbs free energy of NbP in the HER process.

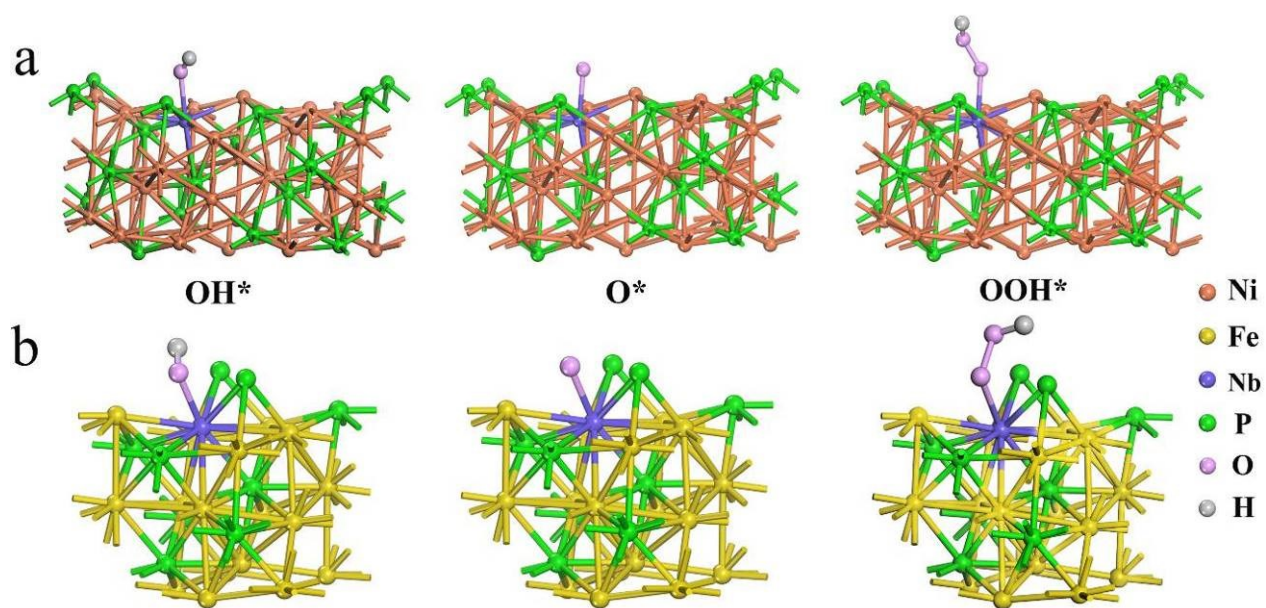

**Figure S21.** Adsorption geometries of the intermediates  $\text{OH}^*$ ,  $\text{O}^*$  and  $\text{OOH}^*$  on the Nb-Ni<sub>12</sub>P<sub>5</sub> (a) and Nb-Fe<sub>2</sub>P (b) in the OER process.

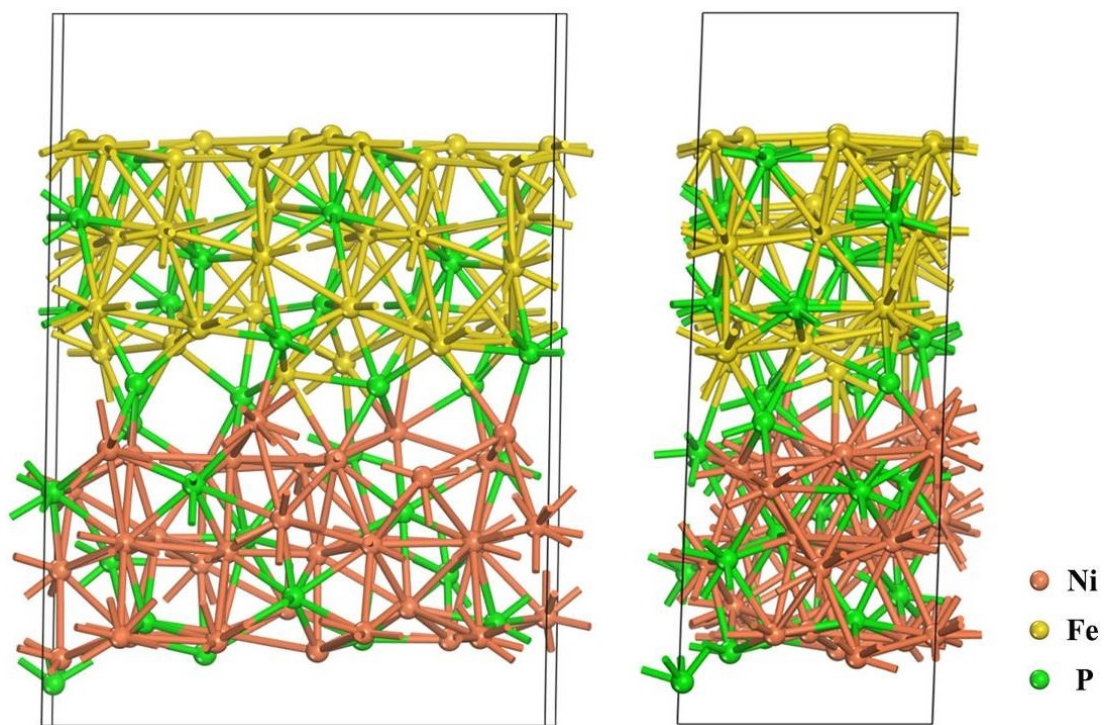

**Figure S22.** The structure of the heterojunction formed by  $\text{Ni}_{12}\text{P}_5$  and  $\text{Fe}_2\text{P}$ .

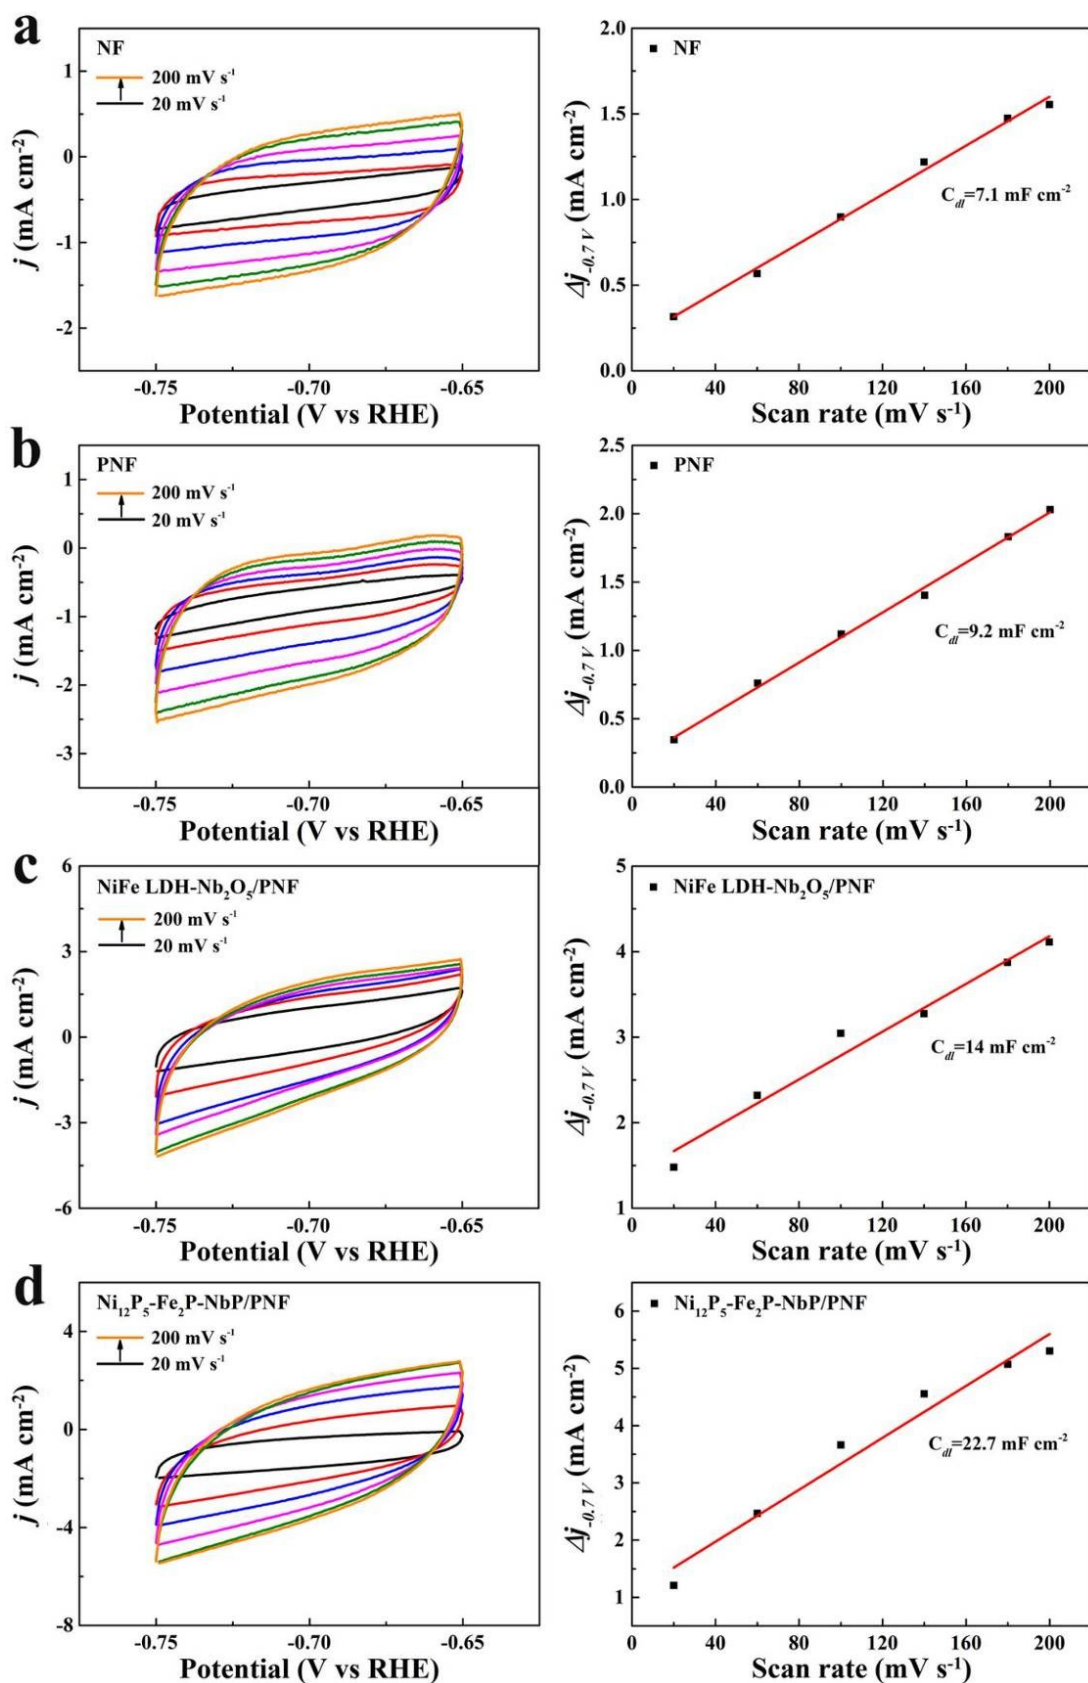

**Figure S23.** CV curves of electrocatalysts at a scan rate from 20 to 200  $\text{mV s}^{-1}$  in 1 M KOH (left) and the calculated  $C_{dl}$  (right), (a) NF, (b) PNF, (c) NiFe LDH-Nb<sub>2</sub>O<sub>5</sub>/PNF and (d) Ni<sub>12</sub>P<sub>5</sub>-Fe<sub>2</sub>P-NbP/PNF.

### 3. Supplementary Tables

**Table S1.** The atomic concentration of different samples.

| <b>Element</b>                                              | <b>C1s</b> | <b>O1s</b> | <b>Ni2p</b> | <b>Fe2p</b> | <b>Nb3d</b> | <b>P2p</b> |
|-------------------------------------------------------------|------------|------------|-------------|-------------|-------------|------------|
| <b>Atomic %</b>                                             |            |            |             |             |             |            |
| <b>NiFe LDH-Nb<sub>2</sub>O<sub>5</sub>/PNF</b>             | 35.78      | 40.52      | 15.34       | 5.99        | 2.37        | /          |
| <b>Ni<sub>12</sub>P<sub>5</sub>-Fe<sub>2</sub>P-NbP/PNF</b> | 36.89      | 35.86      | 8.36        | 2.75        | 0.92        | 15.22      |
| <b>After 100 h HER</b>                                      | 37.08      | 43.30      | 13.47       | 2.89        | 1.61        | 1.66       |
| <b>After 100 h OER</b>                                      | 25.01      | 50.28      | 17.68       | 2.69        | 1.76        | 2.58       |

**Table S2.** The elemental composition of Ni<sub>12</sub>P<sub>5</sub>-Fe<sub>2</sub>P-NbP/PNF from ICP-OES.

| Element<br>Atomic % | Ni2p                                                       | Fe2p  | Nb3d | P2p |
|---------------------|------------------------------------------------------------|-------|------|-----|
|                     | Ni <sub>12</sub> P <sub>5</sub> -Fe <sub>2</sub> P-NbP/PNF | 90.75 | 0.36 | 1.7 |

**Table S3.** Comparison of electrocatalytic HER activity of various nonprecious catalysts in 1.0 M KOH electrolyte.

| Catalysts                                                         | $\eta$ (mV)<br>@<br>$J$ (mA cm <sup>-2</sup> ) | Tafel slope              | Stability (h)<br>@<br>$J$ (mA cm <sup>-2</sup> ) | References |
|-------------------------------------------------------------------|------------------------------------------------|--------------------------|--------------------------------------------------|------------|
| <b>Ni<sub>12</sub>P<sub>5</sub>-Fe<sub>2</sub>P-NbP/PNF</b>       | 58@10                                          | 52 mV dec <sup>-1</sup>  | 100@100<br>100@300                               | This Work  |
|                                                                   | 178@100                                        |                          |                                                  |            |
|                                                                   | 244@300                                        |                          |                                                  |            |
|                                                                   | 265@400                                        |                          |                                                  |            |
|                                                                   | 311@800                                        |                          |                                                  |            |
| <b>FeCO<sub>3</sub>@IF</b>                                        | 151@10                                         | 139 mV dec <sup>-1</sup> | 20@10                                            | S6         |
|                                                                   | 280@100                                        |                          | 45@100                                           |            |
| <b>(Ni-Fe)<sub>x</sub>/NiFe(OH)<sub>y</sub></b>                   | 124@100                                        | 68 mV dec <sup>-1</sup>  | 48@120                                           | S7         |
| <b>N-NiVFeP/NFF</b>                                               | 79@10                                          | 78 mV dec <sup>-1</sup>  | 100@10                                           | S8         |
|                                                                   | 178@50                                         |                          | 100@100                                          |            |
|                                                                   | 205@100                                        |                          |                                                  |            |
| <b>Am FePO<sub>4</sub>/NF</b>                                     | 123@10                                         | 104 mV dec <sup>-1</sup> | 15@10                                            | S9         |
|                                                                   | 250@100                                        |                          |                                                  |            |
| <b>Ni<sub>0.9</sub>Co<sub>0.1</sub>O<sub>x</sub>H<sub>y</sub></b> | 85@10                                          | 85 mV dec <sup>-1</sup>  | N/A                                              | S10        |
|                                                                   | 180@100                                        |                          |                                                  |            |
| <b>CoNiSe<sub>2</sub>@CoNi-LDHs/NF</b>                            | 106@10                                         | 74 mV dec <sup>-1</sup>  | 30@50                                            | S11        |
|                                                                   | 228@100                                        |                          |                                                  |            |
| <b>Nest-like NiCoP/CC</b>                                         | 62@10                                          | 68 mV dec <sup>-1</sup>  | 15@20                                            | S12        |
|                                                                   | 158@100                                        |                          |                                                  |            |
| <b>NiFe LDH@NiCoP/NF</b>                                          | 120@10                                         | 88 mV dec <sup>-1</sup>  | 100@10                                           | S13        |
|                                                                   | 320@100                                        |                          |                                                  |            |
| <b>Ni<sub>3</sub>N-VN/NF</b>                                      | 64@10                                          | 37 mV dec <sup>-1</sup>  | 20@10                                            | S14        |
|                                                                   | 218@100                                        |                          |                                                  |            |

|                                                              |         |                         |        |     |
|--------------------------------------------------------------|---------|-------------------------|--------|-----|
| <b>Ni<sub>3</sub>Se<sub>4</sub>@NiFe LDH/CFC</b>             | 85@10   | 99 mV dec <sup>-1</sup> | 100@10 | S15 |
|                                                              | 220@100 |                         |        |     |
| <b>P-Ni<sub>2</sub>P/NF</b>                                  | 134@10  | 92 mV dec <sup>-1</sup> | 48@100 | S16 |
|                                                              | 250@100 |                         | 48@500 |     |
| <b>Ni<sub>2</sub>P/Fe<sub>2</sub>P</b>                       | 121@10  | 67 mV dec <sup>-1</sup> | 20@100 | S17 |
|                                                              | 300@500 |                         |        |     |
| <b>CoFeP NFs/NPCNT</b>                                       | 137@10  | 64 mV dec <sup>-1</sup> | 40@10  | S18 |
|                                                              | 198@50  |                         |        |     |
| <b>Meso-Fe-MoS<sub>2</sub>/CoMo<sub>2</sub>S<sub>4</sub></b> | 122@10  | 90 mV dec <sup>-1</sup> | 20@10  | S19 |
|                                                              | 195@50  |                         |        |     |



**Table S4.** TOF for Pt/C/PNF, NiFe LDH-Nb<sub>2</sub>O<sub>5</sub>/PNF and Ni<sub>12</sub>P<sub>5</sub>-Fe<sub>2</sub>P-NbP/PNF at the overpotential of 40, 60, 80, 100, 150 and 200 mV in the HER process.

| <b>TOF s<sup>-1</sup></b> | <b>Pt/C/PNF</b>       | <b>NiFe LDH-Nb<sub>2</sub>O<sub>5</sub>/PNF</b> | <b>Ni<sub>12</sub>P<sub>5</sub>-Fe<sub>2</sub>P-NbP/PNF</b> |
|---------------------------|-----------------------|-------------------------------------------------|-------------------------------------------------------------|
| <b>40 mV</b>              | 7.73×10 <sup>-4</sup> | 6.19×10 <sup>-3</sup>                           | 1.37×10 <sup>-2</sup>                                       |
| <b>60 mV</b>              | 1.59×10 <sup>-3</sup> | 1.07×10 <sup>-2</sup>                           | 2.46×10 <sup>-2</sup>                                       |
| <b>80 mV</b>              | 2.92×10 <sup>-3</sup> | 1.65×10 <sup>-2</sup>                           | 3.84×10 <sup>-2</sup>                                       |
| <b>100 mV</b>             | 4.86×10 <sup>-3</sup> | 2.42×10 <sup>-2</sup>                           | 5.85×10 <sup>-2</sup>                                       |
| <b>150 mV</b>             | 1.15×10 <sup>-2</sup> | 6.46×10 <sup>-2</sup>                           | 1.53×10 <sup>-1</sup>                                       |
| <b>200 mV</b>             | 2.37×10 <sup>-2</sup> | 1.58×10 <sup>-1</sup>                           | 3.35×10 <sup>-1</sup>                                       |

**Table S5.** The Mass Activity (MA) for Pt/C/PNF, NiFe LDH-Nb<sub>2</sub>O<sub>5</sub>/PNF and Ni<sub>12</sub>P<sub>5</sub>-Fe<sub>2</sub>P-NbP/PNF in the HER process.

| <b>MA (mA g<sup>-1</sup>)</b> | <b>Pt/C/PNF</b>      | <b>NiFe LDH-Nb<sub>2</sub>O<sub>5</sub>/PNF</b> | <b>Ni<sub>12</sub>P<sub>5</sub>-Fe<sub>2</sub>P-NbP/PNF</b> |
|-------------------------------|----------------------|-------------------------------------------------|-------------------------------------------------------------|
| <b>60 mV</b>                  | 7.86×10 <sup>2</sup> | 3.43×10 <sup>3</sup>                            | 4.18×10 <sup>3</sup>                                        |
| <b>80 mV</b>                  | 1.45×10 <sup>3</sup> | 5.25×10 <sup>3</sup>                            | 6.40×10 <sup>3</sup>                                        |
| <b>100 mV</b>                 | 2.40×10 <sup>3</sup> | 7.75×10 <sup>3</sup>                            | 9.88×10 <sup>3</sup>                                        |
| <b>150 mV</b>                 | 5.70×10 <sup>3</sup> | 2.08×10 <sup>4</sup>                            | 2.59×10 <sup>4</sup>                                        |
| <b>200 mV</b>                 | 1.17×10 <sup>4</sup> | 5.09×10 <sup>4</sup>                            | 5.68×10 <sup>4</sup>                                        |

**Table S6.** Comparison of evolved H<sub>2</sub> amount occurred on the various nonprecious catalysts electrodes.

| Catalysts                                                  | Electrolytes | Current Density        | H <sub>2</sub> generation amount | References |
|------------------------------------------------------------|--------------|------------------------|----------------------------------|------------|
| Ni <sub>12</sub> P <sub>5</sub> -Fe <sub>2</sub> P-NbP/PNF | 1.0 M KOH    | 10 mA cm <sup>-2</sup> | 1486 μmol h <sup>-1</sup>        | This Work  |
| FeCO <sub>3</sub> @IF                                      | 1.0 M KOH    | 50 mA cm <sup>-2</sup> | 930 μmol h <sup>-1</sup>         | S6         |
| (Ni-Fe) <sub>x</sub> S <sub>y</sub> /NiFe(OH) <sub>y</sub> | 1.0 M KOH    | 20 mA cm <sup>-2</sup> | 370 μmol h <sup>-1</sup>         | S7         |
| N-NiVFeP/NFF                                               | 1.0 M KOH    | 10 mA cm <sup>-2</sup> | 1610 μmol h <sup>-1</sup>        | S8         |
| Am FePO <sub>4</sub> /NF                                   | 1.0 M KOH    | 10 mA cm <sup>-2</sup> | 1380 μmol h <sup>-1</sup>        | S9         |
| CoNiSe <sub>2</sub> @CoNi-LDHs/NF                          | 1.0 M KOH    | 10 mA cm <sup>-2</sup> | 982 μmol h <sup>-1</sup>         | S11        |
| Ni <sub>3</sub> N-VN/NF                                    | 1.0 M KOH    | 10 mA cm <sup>-2</sup> | 470 μmol h <sup>-1</sup>         | S14        |
| CoFeP NFs/NPCNT                                            | 1.0 M KOH    | 10 mA cm <sup>-2</sup> | 175 μmol h <sup>-1</sup>         | S18        |
| Meso-Fe-MoS <sub>2</sub> /CoMo <sub>2</sub> S <sub>4</sub> | 1.0 M KOH    | 10 mA cm <sup>-2</sup> | 893 μmol h <sup>-1</sup>         | S19        |
| NiS <sub>0.5</sub> Se <sub>0.5</sub>                       | 1.0 M KOH    | 10 mA cm <sup>-2</sup> | 188 μmol h <sup>-1</sup>         | S20        |
| (FeCoNi) <sub>9</sub> S <sub>8</sub> -MoS <sub>2</sub>     | 1.0 M KOH    | 20 mA cm <sup>-2</sup> | 370 μmol h <sup>-1</sup>         | S21        |
| N-NiCoP/NCF                                                | 1.0 M KOH    | 10 mA cm <sup>-2</sup> | 680 μmol h <sup>-1</sup>         | S22        |
| Cu@NiFe LDH                                                | 1.0 M KOH    | 40 mA cm <sup>-2</sup> | 720 μmol h <sup>-1</sup>         | S23        |
| Fe <sub>17.5%</sub> -Ni <sub>3</sub> S <sub>2</sub> /NF    | 1.0 M KOH    | 10 mA cm <sup>-2</sup> | 912 μmol h <sup>-1</sup>         | S24        |

**Table S7.** Comparison of electrocatalytic OER activity of various nonprecious catalysts in 1.0 M KOH electrolyte.

| Catalysts                                                         | $\eta$ (mV)<br>@<br>$J$ (mA cm <sup>-2</sup> ) | Tafel slope             | Stability (h)<br>@<br>$J$ (mA cm <sup>-2</sup> ) | References |
|-------------------------------------------------------------------|------------------------------------------------|-------------------------|--------------------------------------------------|------------|
| <b>Ni<sub>12</sub>P<sub>5</sub>-Fe<sub>2</sub>P-NbP/PNF</b>       | 260@50                                         | 59 mV dec <sup>-1</sup> | 100@100                                          | This Work  |
|                                                                   | 280@100                                        |                         | 100@300                                          |            |
|                                                                   | 330@400                                        |                         |                                                  |            |
| <b>FeCO<sub>3</sub>@IF</b>                                        | 273@10                                         | 59 mV dec <sup>-1</sup> | 20@10                                            | S6         |
|                                                                   | 331@100                                        |                         | 30@100                                           |            |
| <b>(Ni-Fe)<sub>x</sub>NiFe(OH)<sub>y</sub></b>                    | 199@10                                         | 58 mV dec <sup>-1</sup> | 50@100                                           | S7         |
|                                                                   | 290@100                                        |                         |                                                  |            |
| <b>N-NiVFeP/NFF</b>                                               | 229@10                                         | 72 mV dec <sup>-1</sup> | 100@10                                           | S8         |
|                                                                   | 328@50                                         |                         | 100@100                                          |            |
|                                                                   | 386@100                                        |                         |                                                  |            |
| <b>Am FePO<sub>4</sub>/NF</b>                                     | 218@10                                         | 43 mV dec <sup>-1</sup> | 15@10                                            | S9         |
|                                                                   | 260@100                                        |                         |                                                  |            |
|                                                                   | 270@300                                        |                         |                                                  |            |
| <b>Ni<sub>0.9</sub>Co<sub>0.1</sub>O<sub>x</sub>H<sub>y</sub></b> | 239@10                                         | 46 mV dec <sup>-1</sup> | N/A                                              | S10        |
|                                                                   | 288@100                                        |                         |                                                  |            |
| <b>CoNiSe<sub>2</sub>@CoNi-LDHs/NF</b>                            | 208@10                                         | 39 mV dec <sup>-1</sup> | 48@25                                            | S11        |
|                                                                   | 343@100                                        |                         |                                                  |            |
| <b>Nest-like NiCoP/CC</b>                                         | 242@10                                         | 64 mV dec <sup>-1</sup> | 11@100                                           | S12        |
|                                                                   | 330@100                                        |                         |                                                  |            |
| <b>NiFe LDH@NiCoP/NF</b>                                          | 220@10                                         | 49 mV dec <sup>-1</sup> | 100@10                                           | S13        |
|                                                                   | 360@100                                        |                         |                                                  |            |
| <b>Ni<sub>2</sub>P-VP<sub>2</sub>/NF</b>                          | 306@50                                         | 49 mV dec <sup>-1</sup> | 20@10                                            | S14        |

|                                                              |         |                          |        |     |
|--------------------------------------------------------------|---------|--------------------------|--------|-----|
|                                                              | 398@100 |                          |        |     |
| <b>Ni<sub>3</sub>Se<sub>4</sub>@NiFe LDH/CFC</b>             | 223@10  |                          |        |     |
|                                                              | 250@50  | 56 mV dec <sup>-1</sup>  | 100@50 | S15 |
|                                                              | 290@100 |                          |        |     |
| <b>Meso-Fe-MoS<sub>2</sub>/CoMo<sub>2</sub>S<sub>4</sub></b> | 290@10  |                          |        |     |
|                                                              | 333@50  | 65 mV dec <sup>-1</sup>  | 20@10  | S19 |
|                                                              | 360@100 |                          |        |     |
| <b>NiTe<sub>2</sub>/Ni(OH)<sub>2</sub>/CFC</b>               | 267@10  |                          |        |     |
|                                                              | 320@100 | 75 mV dec <sup>-1</sup>  | 30@10  | S25 |
|                                                              |         |                          |        |     |
| <b>NiSe<sub>2</sub>/g-C<sub>3</sub>N<sub>4</sub></b>         | 290@40  | 143 mV dec <sup>-1</sup> | 10@10  | S26 |
| <b>Ni-Fe-MOFs NSs</b>                                        | 221@10  |                          |        |     |
|                                                              |         | 56 mV dec <sup>-1</sup>  | 20@10  | S27 |
|                                                              | 320@100 |                          |        |     |

**Table S8.** TOF for Pt/C/PNF, NiFe LDH-Nb<sub>2</sub>O<sub>5</sub>/PNF and Ni<sub>12</sub>P<sub>5</sub>-Fe<sub>2</sub>P-NbP/PNF at the overpotential of 220, 250, 280, 310 and 340 mV in the OER process.

| TOF s <sup>-1</sup> | RuO <sub>2</sub> /PNF | NiFe LDH-Nb <sub>2</sub> O <sub>5</sub> /PNF | Ni <sub>12</sub> P <sub>5</sub> -Fe <sub>2</sub> P-NbP/PNF |
|---------------------|-----------------------|----------------------------------------------|------------------------------------------------------------|
| 220 mV              | 1.71×10 <sup>-3</sup> | 7.87×10 <sup>-3</sup>                        | 3.96×10 <sup>-2</sup>                                      |
| 250 mV              | 2.26×10 <sup>-3</sup> | 7.9×10 <sup>-3</sup>                         | 4.67×10 <sup>-2</sup>                                      |
| 280 mV              | 3.17×10 <sup>-3</sup> | 9.27×10 <sup>-3</sup>                        | 9.27×10 <sup>-2</sup>                                      |
| 310 mV              | 5.11×10 <sup>-3</sup> | 1.85×10 <sup>-2</sup>                        | 2.34×10 <sup>-1</sup>                                      |
| 340 mV              | 7.88×10 <sup>-3</sup> | 6.24×10 <sup>-2</sup>                        | 4.71×10 <sup>-1</sup>                                      |

**Table S9.** The Mass Activity (MA) for Pt/C/PNF, NiFe LDH-Nb<sub>2</sub>O<sub>5</sub>/PNF and Ni<sub>12</sub>P<sub>5</sub>-Fe<sub>2</sub>P-NbP/PNF in the OER process.

| <b>MA (mA g<sup>-1</sup>)</b> | <b>RuO<sub>2</sub>/PNF</b> | <b>NiFe LDH-Nb<sub>2</sub>O<sub>5</sub>/PNF</b> | <b>Ni<sub>12</sub>P<sub>5</sub>-Fe<sub>2</sub>P-NbP/PNF</b> |
|-------------------------------|----------------------------|-------------------------------------------------|-------------------------------------------------------------|
| <b>220 mV</b>                 | 8.13×10 <sup>2</sup>       | 5.09×10 <sup>2</sup>                            | 1.34×10 <sup>3</sup>                                        |
| <b>250 mV</b>                 | 1.08×10 <sup>3</sup>       | 5.44×10 <sup>2</sup>                            | 1.58×10 <sup>3</sup>                                        |
| <b>280 mV</b>                 | 1.57×10 <sup>3</sup>       | 6.39×10 <sup>2</sup>                            | 3.15×10 <sup>3</sup>                                        |
| <b>310 mV</b>                 | 2.43×10 <sup>3</sup>       | 1.27×10 <sup>3</sup>                            | 7.57×10 <sup>3</sup>                                        |
| <b>340 mV</b>                 | 3.75×10 <sup>3</sup>       | 4.31×10 <sup>3</sup>                            | 1.53 ×10 <sup>4</sup>                                       |

**Table S10.** Comparison of the evolved O<sub>2</sub> amount generated on the various nonprecious catalysts electrodes.

| Catalysts                                                  | Electrolytes | Current Density        | O <sub>2</sub> generation amount | References |
|------------------------------------------------------------|--------------|------------------------|----------------------------------|------------|
| Ni <sub>12</sub> P <sub>5</sub> -Fe <sub>2</sub> P-NbP/PNF | 1.0 M KOH    | 10 mA cm <sup>-2</sup> | 708 μmol h <sup>-1</sup>         | This Work  |
| FeCO <sub>3</sub> @IF                                      | 1.0 M KOH    | 50 mA cm <sup>-2</sup> | 460 μmol h <sup>-1</sup>         | S6         |
| (Ni-Fe) <sub>x</sub> S <sub>y</sub> /NiFe(OH) <sub>y</sub> | 1.0 M KOH    | 20 mA cm <sup>-2</sup> | 180 μmol h <sup>-1</sup>         | S7         |
| N-NiVFeP/NFF                                               | 1.0 M KOH    | 10 mA cm <sup>-2</sup> | 810 μmol h <sup>-1</sup>         | S8         |
| Am FePO <sub>4</sub> /NF                                   | 1.0 M KOH    | 10 mA cm <sup>-2</sup> | 629 μmol h <sup>-1</sup>         | S9         |
| CoNiSe <sub>2</sub> @CoNi-LDHs/NF                          | 1.0 M KOH    | 10 mA cm <sup>-2</sup> | 446 μmol h <sup>-1</sup>         | S11        |
| Ni <sub>2</sub> P-VP <sub>2</sub> /NF                      | 1.0 M KOH    | 10 mA cm <sup>-2</sup> | 230 μmol h <sup>-1</sup>         | S14        |
| CoFeP NFs/NPCNT                                            | 1.0 M KOH    | 10 mA cm <sup>-2</sup> | 88 μmol h <sup>-1</sup>          | S18        |
| Meso-Fe-MoS <sub>2</sub> /CoMo <sub>2</sub> S <sub>4</sub> | 1.0 M KOH    | 10 mA cm <sup>-2</sup> | 455 μmol h <sup>-1</sup>         | S19        |
| NiS <sub>0.5</sub> Se <sub>0.5</sub>                       | 1.0 M KOH    | 10 mA cm <sup>-2</sup> | 89 μmol h <sup>-1</sup>          | S20        |
| (FeCoNi) <sub>9</sub> S <sub>8</sub> -MoS <sub>2</sub>     | 1.0 M KOH    | 20 mA cm <sup>-2</sup> | 180 μmol h <sup>-1</sup>         | S21        |
| N-NiCoP/NCF                                                | 1.0 M KOH    | 10 mA cm <sup>-2</sup> | 400 μmol h <sup>-1</sup>         | S22        |
| Cu@NiFe LDH                                                | 1.0 M KOH    | 40 mA cm <sup>-2</sup> | 340 μmol h <sup>-1</sup>         | S23        |
| Fe <sub>17.5%</sub> -Ni <sub>3</sub> S <sub>2</sub> /NF    | 1.0 M KOH    | 10 mA cm <sup>-2</sup> | 463 μmol h <sup>-1</sup>         | S24        |



**Table S11.** Comparison of the full water-splitting performances of Ni<sub>12</sub>P<sub>5</sub>-Fe<sub>2</sub>P-NbP/PNF with other state-of-the-art electrocatalysts in 1.0 M KOH.

| Catalysts                                                         | Cell voltages (V)<br>@<br><i>J</i> (mA cm <sup>-2</sup> ) | References |
|-------------------------------------------------------------------|-----------------------------------------------------------|------------|
| Ni <sub>12</sub> P <sub>5</sub> -Fe <sub>2</sub> P-NbP/PNF        | 1.51@10                                                   | This Work  |
|                                                                   | 1.58@50                                                   |            |
|                                                                   | 1.65@100                                                  |            |
|                                                                   | 1.74@200                                                  |            |
| FeCO <sub>3</sub> @IF                                             | 1.69@10                                                   | S6         |
|                                                                   | 2.36@300                                                  |            |
|                                                                   | 2.51@400                                                  |            |
| (Ni-Fe) <sub>x</sub> /NiFe(OH) <sub>y</sub>                       | 1.46@10                                                   | S7         |
|                                                                   | 1.73@100                                                  |            |
| N-NiVFeP/NFF                                                      | 1.52@10                                                   | S8         |
|                                                                   | 1.68@100                                                  |            |
| Am FePO <sub>4</sub> /NF                                          | 1.54@10                                                   | S9         |
|                                                                   | 1.72@100                                                  |            |
| Ni <sub>0.9</sub> Co <sub>0.1</sub> O <sub>x</sub> H <sub>y</sub> | 1.58@10                                                   | S10        |
|                                                                   | 1.72@50                                                   |            |
| CoNiSe <sub>2</sub> @CoNi-LDHs/NF                                 | 1.44@10                                                   | S11        |
|                                                                   | 1.65@50                                                   |            |
|                                                                   | 1.69@100                                                  |            |
| Nest-like NiCoP/CC                                                | 1.52@10                                                   | S12        |
|                                                                   | 1.77@100                                                  |            |
| NiFe LDH@NiCoP/NF                                                 | 1.57@10                                                   | S13        |
|                                                                   | 1.91@100                                                  |            |

|                                                                 |          |     |
|-----------------------------------------------------------------|----------|-----|
| <b>Ni<sub>3</sub>N-VN/NF  Ni<sub>2</sub>P-VP<sub>2</sub>/NF</b> | 1.51@10  | S14 |
|                                                                 | 1.74@50  |     |
| <b>Ni<sub>3</sub>Se<sub>4</sub>@NiFe LDH/CFC</b>                | 1.54@10  | S15 |
|                                                                 | 1.76@100 |     |
| <b>Meso-Fe-MoS<sub>2</sub>/CoMo<sub>2</sub>S<sub>4</sub></b>    | 1.62@10  | S19 |
|                                                                 | 1.78@50  |     |
| <b>NiS<sub>0.5</sub>Se<sub>0.5</sub></b>                        | 1.55@10  | S20 |
|                                                                 | 1.74@100 |     |
| <b>Cu@NiFe LDH</b>                                              | 1.54@10  | S23 |
|                                                                 | 1.69@100 |     |
| <b>Fe<sub>17.5%</sub>-Ni<sub>3</sub>S<sub>2</sub>/NF</b>        | 1.54@10  | S24 |
|                                                                 | 1.60@20  |     |
|                                                                 | 1.70@100 |     |

## References

- [S1] Q. Zhang, W. Chen, G. Chen, J. Huang, C. Song, S. Chu, R. Zhang, G. Wang, C. Li, K.K. Ostrikov, Bi-metallic nitroxide nanodot-decorated tri-metallic sulphide nanosheets by on-electrode plasma-hydrothermal sprouting for overall water splitting. *Appl. Catal. B: Environ.* 2020, **261**, 118254.
- [S2] L. Meng, J. He, W. Tian, M. Wang, R. Long, L. Li, Ni/Fe Codoped  $\text{In}_2\text{S}_3$  Nanosheet Arrays Boost Photo-Electrochemical Performance of Planar Si Photocathodes. *Adv. Energy Mater.* 2019, **9**(38), 1902135.
- [S3] S. Qu, W. Chen, J. Yu, G. Chen, R. Zhang, S. Chu, J. Huang, X. Wang, C. Li, K. Ostrikov, Cross-linked trimetallic nanopetals for electrocatalytic water splitting. *J. Power Sources* 2018, **390**, 224-233.
- [S4] R. Jin, J. Huang, G. Chen, W. Chen, B. Ouyang, D. Chen, E. Kan, H. Zhu, C. Li, D. Yang, K. Ostrikov, Water-sprouted, plasma-enhanced Ni-Co phospho-nitride nanosheets boost electrocatalytic hydrogen and oxygen evolution. *Chem. Engineering J.* 2020, **402**, 126257.
- [S5] J. Huang, S. Wen, G. Chen, W. Chen, G. Wang, H. Fan, D. Chen, C. Song, M. Li, X. Wang, L. Li, M. Tao, B. Li, X. Wang, K. Ostrikov, Multiphase Ni-Fe-selenide nanosheets for highly-efficient and ultra-stable water electrolysis. *Appl. Catal. B: Environ.* 2020, **277**, 119220.
- [S6] T. Gao, C. Zhou, X. Chen, Z. Huang, H. Yuan, D. Xiao, Surface in situ self-reconstructing hierarchical structures derived from ferrous carbonate as efficient bifunctional iron-based catalysts for oxygen and hydrogen evolution reactions. *Journal of Materials Chemistry A* 2020, **8**, 18367-18375.
- [S7] Q. Che, Q. Li, Y. Tan, X. Chen, X. Xu, Y. Chen, One-step controllable synthesis of amorphous  $(\text{Ni-Fe})\text{S}_x/\text{NiFe}(\text{OH})_y$  hollow microtube/sphere films as superior bifunctional electrocatalysts for quasi-industrial water splitting at large-current-density. *Applied Catalysis B: Environmental* 2019, **246**, 337-348.

- [S8] H. Fan, W. Chen, G. Chen, J. Huang, C. Song, Y. Du, C. Li, K. Ostrikov, Plasma-heteroatom-doped Ni-V-Fe trimetallic phospho-nitride as high-performance bifunctional electrocatalyst. *Applied Catalysis B: Environmental* 2020, **268**, 118440.
- [S9] L. Yang, Z. Guo, J. Huang, Y. Xi, R. Gao, G. Su, W. Wang, L. Cao, B. Dong, Vertical Growth of 2D Amorphous FePO<sub>4</sub> Nanosheet on Ni Foam: Outer and Inner Structural Design for Superior Water Splitting. *Advanced Materials* 2017, **29**, 1704574.
- [S10] Q. Zhao, J. Yang, M. Liu, R. Wang, G. Zhang, H. Wang, H. Tang, C. Liu, Z. Mei, H. Chen, F. Pan, Tuning Electronic Push/Pull of Ni-Based Hydroxides To Enhance Hydrogen and Oxygen Evolution Reactions for Water Splitting. *ACS Catalysis* 2018, **8**, 5621-5629.
- [S11] Y. Yang, W. Zhang, Y. Xiao, Z. Shi, X. Cao, Y. Tang, Q. Gao, CoNiSe<sub>2</sub> heteronanorods decorated with layered-double-hydroxides for efficient hydrogen evolution. *Applied Catalysis B: Environmental* 2019, **242**, 132-139.
- [S12] C. Du, L. Yang, F. Yang, G. Cheng, W. Luo, Nest-like NiCoP for Highly Efficient Overall Water Splitting. *ACS Catalysis* 2017, **7**, 4131-4137.
- [S13] H. Zhang, X. Li, A. Hähnel, V. Naumann, C. Lin, S. Azimi, S.L. Schweizer, A.W. Maijenburg, R.B. Wehrspohn, Bifunctional Heterostructure Assembly of NiFe LDH Nanosheets on NiCoP Nanowires for Highly Efficient and Stable Overall Water Splitting. *Advanced Functional Materials* 2018, **28**, 1706847.
- [S14] H. Yan, Y. Xie, A. Wu, Z. Cai, L. Wang, C. Tian, X. Zhang, H. Fu, Anion-Modulated HER and OER Activities of 3D Ni-V-Based Interstitial Compound Heterojunctions for High-Efficiency and Stable Overall Water Splitting. *Advanced Materials* 2019, **31**, 1901174.

- [S15] T. Zhang, L. Hang, Y. Sun, D. Men, X. Li, L. Wen, X. Lyu, Y. Li, Hierarchical hetero-Ni<sub>3</sub>Se<sub>4</sub>@NiFe LDH micro/nanosheets as efficient bifunctional electrocatalysts with superior stability for overall water splitting. *Nanoscale Horizons* 2019, **4**, 1132-1138.
- [S16] X. Jin, J. Li, Y. Cui, X. Liu, K. Wang, Y. Zhou, W. Yang, X. Zhang, C. Zhang, X. Jiang, B. Liu, In-situ synthesis of porous Ni<sub>2</sub>P nanosheets for efficient and stable hydrogen evolution reaction. *International Journal of Hydrogen Energy* 2019, **44**, 5739-5747.
- [S17] Y. Ge, P. Dong, S.R. Craig, P.M. Ajayan, M. Ye, J. Shen, Transforming Nickel Hydroxide into 3D Prussian Blue Analogue Array to Obtain Ni<sub>2</sub>P/Fe<sub>2</sub>P for Efficient Hydrogen Evolution Reaction. *Advanced Energy Materials* 2018, **8**, 1800484.
- [S18] W. Li, Y. Chen, B. Yu, Y. Hu, X. Wang, D. Yang, 3D hollow Co-Fe-P nanoframes immobilized on N,P-doped CNT as an efficient electrocatalyst for overall water splitting. *Nanoscale* 2019, **11**, 17031-17040.
- [S19] Y. Guo, J. Tang, J. Henzie, B. Jiang, W. Xia, T. Chen, Y. Bando, Y.M. Kang, M.S.A. Hossain, Y. Sugahara, Y. Yamauchi, Mesoporous Iron-doped MoS<sub>2</sub>/CoMo<sub>2</sub>S<sub>4</sub> Heterostructures through Organic-Metal Cooperative Interactions on Spherical Micelles for Electrochemical Water Splitting. *ACS Nano* 2020, **14**, 4141-4152.
- [S20] Y. Wang, X. Li, M. Zhang, Y. Zhou, D. Rao, C. Zhong, J. Zhang, X. Han, W. Hu, Y. Zhang, K. Zaghbi, Y. Wang, Y. Deng, Lattice-Strain Engineering of Homogeneous NiS<sub>0.5</sub>Se<sub>0.5</sub> Core-Shell Nanostructure as a Highly Efficient and Robust Electrocatalyst for Overall Water Splitting. *Advanced Materials* 2020, **32**, 2000231.
- [S21] H. Li, S. Chen, Y. Zhang, Q. Zhang, X. Jia, Q. Zhang, L. Gu, X. Sun, L. Song, X. Wang, Systematic design of superaerophobic nanotube-array electrode comprised of transition-metal sulfides for overall water splitting. *Nature Communications* 2018, **9**, 2452.

- [S22] R. Zhang, J. Huang, G. Chen, W. Chen, C. Song, C. Li, K. Ostrikov, In situ engineering bi-metallic phospho-nitride bi-functional electrocatalysts for overall water splitting. *Applied Catalysis B: Environmental* 2019, **254**, 414-423.
- [S23] L. Yu, H. Zhou, J. Sun, F. Qin, F. Yu, J. Bao, Y. Yu, S. Chen, Z. Ren, Cu nanowires shelled with NiFe layered double hydroxide nanosheets as bifunctional electrocatalysts for overall water splitting. *Energy & Environmental Science* 2017, **10**, 1820-1827.
- [S24] G. Zhang, Y.S. Feng, W.T. Lu, D. He, C.Y. Wang, Y.K. Li, X.Y. Wang, F.F. Cao, Enhanced Catalysis of Electrochemical Overall Water Splitting in Alkaline Media by Fe Doping in Ni<sub>3</sub>S<sub>2</sub> Nanosheet Arrays. *ACS Catalysis* 2018, **8**, 5431-5441.
- [S25] B. Xu, X. Yang, X. Liu, W. Song, Y. Sun, Q. Liu, H. Yang, C. Li, Lattice distortion in hybrid NiTe<sub>2</sub>/Ni(OH)<sub>2</sub> nanosheets as efficient synergistic electrocatalyst for water and urea oxidation. *Journal of Power Sources* 2020, **449**, 227585.
- [S26] S. Wang, P. He, L. Jia, M. He, T. Zhang, F. Dong, M. Liu, H. Liu, Y. Zhang, C. Li, J. Gao, L. Bian, Nanocoral-like composite of nickel selenide nanoparticles anchored on two-dimensional multi-layered graphitic carbon nitride: A highly efficient electrocatalyst for oxygen evolution reaction. *Applied Catalysis B: Environmental* 2019, **243**, 463-469.
- [S27] F. Li, P. Wang, X. Huang, D.J. Young, H. Wang, P. Braunstein, J. Lang, Large-Scalable, Bottom-Up Synthesis of Binary Metal-Organic Framework Nanosheets for Efficient Water Oxidation. *Angewandte Chemie International Edition* 2019, **58**, 7051-7056.
